# Supplementary material for: Exploration–Exploitation Tradeoff in the Adaptive Information Sampling of Unknown Spatial Fields with Mobile Robots
Source: MDPI journal article supplement (doi:10.3390/s23239600), 2023-12-04
Supplement: s1 [file s1]

# Analysis of Exploration vs. Exploitation in Adaptive Information Sampling

## Appendix SA - Results with Extended Data

TABLE SI

PERFORMANCE METRICS FOR VARIANTS WITH INITIAL FIXED SWEEP  
SCENARIO WITH SIGNAL PROPAGATION EXPONENT N=3.

| Approach       | Source location  | Samples            | Rmse               | Variance             | Cumulative Distance   |
|----------------|------------------|--------------------|--------------------|----------------------|-----------------------|
| Alpha 0.75     | <b>Src(0,0)</b>  | <b>218 ± 3.46</b>  | <b>4.3 ± 0.07</b>  | <b>8.14 ± 2.5</b>    | <b>87.2 ± 1.31</b>    |
|                | Src(0,14)        | 219 ± 4            | 4.08 ± 0.05        | 16.55 ± 16.73        | 97.03 ± 21.16         |
|                | Src(4,7)         | 222 ± 0            | 4.38 ± 0.21        | 9.25 ± 1.16          | 79.65 ± 1.55          |
|                | <b>Src(9,0)</b>  | <b>220 ± 1</b>     | <b>4.29 ± 0.1</b>  | <b>7.1 ± 1.14</b>    | <b>83.86 ± 2.27</b>   |
|                | Src(9,14)        | 216 ± 5.48         | 4.32 ± 0.09        | 15.09 ± 11.41        | 118.02 ± 43.35        |
| Alpha 0.5      | <b>Src(0,0)</b>  | <b>212 ± 4.8</b>   | <b>4.28 ± 0.06</b> | <b>9.62 ± 3.2</b>    | <b>143.65 ± 35.3</b>  |
|                | Src(0,14)        | 204 ± 8.72         | 4.1 ± 0.08         | 21.44 ± 15.62        | 183.58 ± 67.3         |
|                | Src(4,7)         | 198 ± 6.08         | 4.22 ± 0.05        | 12.25 ± 5.16         | 227.79 ± 44.2         |
|                | <b>Src(9,0)</b>  | <b>210 ± 6.71</b>  | <b>4.17 ± 0.06</b> | <b>14.83 ± 14.58</b> | <b>139.26 ± 45.71</b> |
|                | Src(9,14)        | 213 ± 6.56         | 4.2 ± 0.08         | 9.1 ± 2.81           | 147.36 ± 53.53        |
| Alpha 0.25     | <b>Src(0,0)</b>  | <b>188 ± 5.66</b>  | <b>4.17 ± 0.07</b> | <b>5.67 ± 0.46</b>   | <b>320.34 ± 53.94</b> |
|                | <b>Src(0,14)</b> | <b>184 ± 5.2</b>   | <b>4.06 ± 0.08</b> | <b>5.67 ± 0.11</b>   | <b>325.42 ± 35.96</b> |
|                | Src(4,7)         | 174 ± 0            | 4.14 ± 0.07        | 4.73 ± 0.11          | 434.77 ± 10.35        |
|                | Src(9,0)         | 182 ± 6.56         | 4.16 ± 0.04        | 5.87 ± 0.32          | 362.33 ± 55.26        |
|                | Src(9,14)        | 182 ± 7.55         | 4.1 ± 0.08         | 5.87 ± 0.28          | 386.88 ± 61.49        |
| Max Variance   | Src(0,0)         | 153 ± 2.45         | 4.18 ± 0.03        | 2.57 ± 0.1           | 617.44 ± 18.47        |
|                | <b>Src(0,14)</b> | <b>153 ± 2</b>     | <b>3.95 ± 0.08</b> | <b>2.44 ± 0.17</b>   | <b>612.12 ± 14.42</b> |
|                | Src(4,7)         | 155 ± 0            | 4.44 ± 0.13        | 3.0 ± 0.11           | 618.93 ± 15.65        |
|                | Src(9,0)         | 154 ± 1.73         | 4.2 ± 0.04         | 2.17 ± 0.18          | 625.74 ± 14.94        |
|                | <b>Src(9,14)</b> | <b>153 ± 2.65</b>  | <b>4.16 ± 0.06</b> | <b>2.23 ± 0.14</b>   | <b>617.44 ± 17.19</b> |
| Max Mean       | Src(0,0)         | 221 ± 0            | 4.31 ± 0.11        | 11.39 ± 6.55         | 84.99 ± 0.14          |
|                | Src(0,14)        | 222 ± 0            | 4.48 ± 0.23        | 69.25 ± 73.97        | 78.95 ± 1.06          |
|                | <b>Src(4,7)</b>  | <b>222 ± 1</b>     | <b>4.77 ± 0.23</b> | <b>8.81 ± 0.63</b>   | <b>77.74 ± 0.59</b>   |
|                | <b>Src(9,0)</b>  | <b>222 ± 0</b>     | <b>5.51 ± 0.43</b> | <b>4.74 ± 0.38</b>   | <b>81.08 ± 1.44</b>   |
|                | Src(9,14)        | 223 ± 0            | 4.49 ± 0.15        | 66.27 ± 33.04        | 70.39 ± 1.04          |
| Max VarMaxMean | <b>Src(0,0)</b>  | <b>178 ± 15.68</b> | <b>4.28 ± 0.03</b> | <b>5.07 ± 0.37</b>   | <b>402.33 ± 98.39</b> |
|                | Src(0,14)        | 178 ± 8.06         | 4.06 ± 0.13        | 5.19 ± 0.38          | 431.82 ± 59.98        |
|                | Src(4,7)         | 161 ± 13.08        | 4.46 ± 0.07        | 3.76 ± 0.84          | 563.6 ± 102.96        |
|                | <b>Src(9,0)</b>  | <b>180 ± 12.21</b> | <b>4.16 ± 0.1</b>  | <b>5.14 ± 0.59</b>   | <b>405.4 ± 80.93</b>  |
|                | Src(9,14)        | 190 ± 9.9          | 4.23 ± 0.13        | 5.46 ± 1.26          | 324.07 ± 80.26        |
| Fixed Sweep    | <b>Src(0,0)</b>  | <b>36 ± 1.41</b>   | <b>4.37 ± 0.07</b> | <b>6.84 ± 0.3</b>    | <b>68.48 ± 0.74</b>   |
|                | Src(0,14)        | 36 ± 1             | 4.25 ± 0.12        | 8.16 ± 0.34          | 68.08 ± 0.24          |
|                | Src(4,7)         | 36 ± 1.41          | 5.07 ± 0.13        | 9.43 ± 1.96          | 68.72 ± 1.03          |
|                | Src(9,0)         | 36 ± 0             | 5.99 ± 0.09        | 3.75 ± 0.32          | 68.25 ± 0.24          |
|                | <b>Src(9,14)</b> | <b>37 ± 0</b>      | <b>4.39 ± 0.04</b> | <b>7.43 ± 0.79</b>   | <b>68.07 ± 0.1</b>    |

TABLE SII

PERFORMANCE METRICS FOR VARIANTS WITH INITIAL RANDOM WALK  
SCENARIO WITH SIGNAL PROPAGATION EXPONENT N=3.

| Approach       | Source location  | Samples            | Rmse               | Variance            | Cumulative Distance   |
|----------------|------------------|--------------------|--------------------|---------------------|-----------------------|
| Alpha 0.75     | <b>Src(0,0)</b>  | <b>206 ± 14.56</b> | <b>4.32 ± 0.04</b> | <b>23.98 ± 10.6</b> | <b>140.94 ± 75.37</b> |
|                | Src(0,14)        | 191 ± 16.76        | 4.11 ± 0.12        | 18.94 ± 8.66        | 235.2 ± 63.26         |
|                | <b>Src(4,7)</b>  | <b>207 ± 12.57</b> | <b>4.38 ± 0.2</b>  | <b>25.1 ± 3.64</b>  | <b>197.24 ± 92.54</b> |
|                | Src(9,0)         | 209 ± 10.49        | 4.23 ± 0.05        | 27.19 ± 12.45       | 143.65 ± 29.05        |
|                | Src(9,14)        | 213 ± 6.56         | 4.59 ± 0.64        | 36.14 ± 22.46       | 158.95 ± 56.36        |
| Alpha 0.5      | <b>Src(0,0)</b>  | <b>201 ± 6.32</b>  | <b>4.24 ± 0.06</b> | <b>15.19 ± 1.78</b> | <b>234.19 ± 42.78</b> |
|                | Src(0,14)        | 198 ± 7.62         | 4.11 ± 0.05        | 23.0 ± 20.5         | 265.11 ± 57.2         |
|                | Src(4,7)         | 181 ± 6.32         | 4.32 ± 0.07        | 13.37 ± 4.37        | 392.72 ± 51.95        |
|                | <b>Src(9,0)</b>  | <b>196 ± 11.45</b> | <b>4.22 ± 0.09</b> | <b>14.82 ± 3.07</b> | <b>260.51 ± 92.4</b>  |
|                | Src(9,14)        | 194 ± 16.82        | 4.24 ± 0.07        | 14.24 ± 3.76        | 271.49 ± 101.21       |
| Alpha 0.25     | Src(0,0)         | 164 ± 7.62         | 4.15 ± 0.07        | 6.03 ± 0.6          | 530.88 ± 44.93        |
|                | <b>Src(0,14)</b> | <b>169 ± 4.47</b>  | <b>4.03 ± 0.03</b> | <b>5.89 ± 0.35</b>  | <b>466.23 ± 57.16</b> |
|                | Src(4,7)         | 164 ± 2.24         | 4.1 ± 0.08         | 4.84 ± 0.1          | 535.12 ± 22.62        |
|                | Src(9,0)         | 172 ± 11.4         | 4.15 ± 0.06        | 5.94 ± 0.33         | 467.92 ± 109.09       |
|                | <b>Src(9,14)</b> | <b>169 ± 5.66</b>  | <b>4.12 ± 0.04</b> | <b>5.94 ± 0.2</b>   | <b>470.4 ± 46.25</b>  |
| Max Variance   | <b>Src(0,0)</b>  | <b>146 ± 3.32</b>  | <b>4.21 ± 0.06</b> | <b>2.43 ± 0.09</b>  | <b>685.97 ± 22.06</b> |
|                | <b>Src(0,14)</b> | <b>145 ± 3.61</b>  | <b>4.07 ± 0.09</b> | <b>2.39 ± 0.16</b>  | <b>686.95 ± 12.98</b> |
|                | Src(4,7)         | 145 ± 3.87         | 4.25 ± 0.08        | 2.99 ± 0.13         | 703.79 ± 10.7         |
|                | Src(9,0)         | 146 ± 3.74         | 4.19 ± 0.07        | 2.26 ± 0.19         | 700.75 ± 8.85         |
|                | Src(9,14)        | 145 ± 3            | 4.16 ± 0.09        | 2.36 ± 0.08         | 703.92 ± 15.65        |
| Max Mean       | Src(0,0)         | 226 ± 0            | 4.88 ± 0.11        | 76.42 ± 50.15       | 57.99 ± 1.27          |
|                | Src(0,14)        | 225 ± 1.41         | 6.05 ± 1.42        | 62.87 ± 61.2        | 65.17 ± 8.5           |
|                | Src(4,7)         | 226 ± 1            | 6.23 ± 0.58        | 25.7 ± 3.18         | 58.29 ± 0.4           |
|                | <b>Src(9,0)</b>  | <b>226 ± 0</b>     | <b>7.05 ± 0.52</b> | <b>11.67 ± 7.62</b> | <b>62.5 ± 2.35</b>    |
|                | <b>Src(9,14)</b> | <b>226 ± 0</b>     | <b>6.12 ± 0.99</b> | <b>12.53 ± 4.21</b> | <b>63.27 ± 1.45</b>   |
| Max VarMaxMean | Src(0,0)         | 170 ± 11.05        | 4.26 ± 0.06        | 4.84 ± 0.11         | 489.43 ± 58.39        |
|                | <b>Src(0,14)</b> | <b>173 ± 5.48</b>  | <b>4.09 ± 0.07</b> | <b>5.1 ± 0.18</b>   | <b>459.19 ± 62.19</b> |
|                | Src(4,7)         | 160 ± 3.87         | 4.26 ± 0.08        | 5.23 ± 1.12         | 586.45 ± 38.89        |
|                | Src(9,0)         | 169 ± 9.54         | 4.27 ± 0.07        | 4.86 ± 0.17         | 506.21 ± 86.01        |
|                | <b>Src(9,14)</b> | <b>180 ± 10.3</b>  | <b>4.12 ± 0.12</b> | <b>4.82 ± 0.15</b>  | <b>406.98 ± 81.99</b> |
| Random Walk    | <b>Src(0,0)</b>  | <b>150 ± 1.41</b>  | <b>4.52 ± 0.19</b> | <b>2.64 ± 0.3</b>   | <b>520.5 ± 8.52</b>   |
|                | <b>Src(0,14)</b> | <b>150 ± 0</b>     | <b>4.45 ± 0.1</b>  | <b>2.52 ± 0.19</b>  | <b>523.68 ± 2.16</b>  |
|                | Src(4,7)         | 149 ± 1.41         | 4.18 ± 0.04        | 4.91 ± 0.15         | 520.63 ± 6.13         |
|                | Src(9,0)         | 150 ± 1            | 4.6 ± 0.23         | 2.81 ± 0.33         | 522.13 ± 4.16         |
|                | Src(9,14)        | 150 ± 1.41         | 4.5 ± 0.21         | 2.62 ± 0.27         | 517.76 ± 7.03         |

TABLE SIII

PERFORMANCE METRICS FOR VARIANTS WITH INITIAL FIXED SWEEP  
SCENARIO WITH SIGNAL PROPAGATION EXPONENT N=2.

| Approach       | Source location  | Samples           | Rmse               | Variance           | Cumulative Distance   |
|----------------|------------------|-------------------|--------------------|--------------------|-----------------------|
| Alpha 0.75     | Src(0,0)         | 218 ± 2           | 4.15 ± 0.13        | 7.04 ± 1.96        | 96.06 ± 10.12         |
|                | Src(0,14)        | 221 ± 1           | 4.05 ± 0.1         | 5.93 ± 1.93        | 81.12 ± 1.74          |
|                | Src(4,7)         | 221 ± 1           | 4.3 ± 0.11         | 6.61 ± 1.56        | 77.77 ± 0.44          |
|                | Src(9,0)         | 218 ± 3.16        | 4.24 ± 0.09        | 6.92 ± 2.88        | 108.05 ± 25.1         |
|                | Src(9,14)        | 222 ± 0           | 4.18 ± 0.05        | 4.48 ± 1.09        | 69.57 ± 0.7           |
| Alpha 0.5      | <b>Src(0,0)</b>  | <b>211 ± 2.65</b> | <b>4.21 ± 0.06</b> | <b>6.1 ± 0.43</b>  | <b>128.74 ± 8.37</b>  |
|                | Src(0,14)        | 214 ± 6.32        | 4.05 ± 0.14        | 5.53 ± 2.61        | 122.34 ± 51.18        |
|                | Src(4,7)         | 208 ± 6.71        | 4.17 ± 0.05        | 4.89 ± 0.43        | 166.94 ± 39.86        |
|                | Src(9,0)         | 216 ± 2.24        | 4.13 ± 0.04        | 4.9 ± 0.8          | 108.15 ± 6.37         |
|                | Src(9,14)        | 218 ± 4.58        | 4.24 ± 0.11        | 6.35 ± 2.15        | 109.94 ± 37.61        |
| Alpha 0.25     | Src(0,0)         | 197 ± 3.61        | 4.03 ± 0.05        | 3.8 ± 0.21         | 244.17 ± 34.61        |
|                | <b>Src(0,14)</b> | <b>183 ± 5.83</b> | <b>3.94 ± 0.05</b> | <b>3.99 ± 0.15</b> | <b>325.84 ± 52.99</b> |
|                | Src(4,7)         | 180 ± 3.74        | 4.03 ± 0.04        | 3.15 ± 0.1         | 384.61 ± 36.33        |
|                | Src(9,0)         | 197 ± 9.49        | 4.1 ± 0.07         | 3.77 ± 0.16        | 238.37 ± 68.86        |
|                | Src(9,14)        | 184 ± 7.87        | 4.11 ± 0.05        | 3.91 ± 0.9         | 358.96 ± 69.58        |
| Max Variance   | Src(0,0)         | 154 ± 1.41        | 4.07 ± 0.08        | 1.6 ± 0.13         | 629.57 ± 8.02         |
|                | Src(0,14)        | 151 ± 1           | 3.96 ± 0.04        | 1.54 ± 0.13        | 617.18 ± 21.43        |
|                | Src(4,7)         | 150 ± 4.9         | 4.16 ± 0.05        | 1.95 ± 0.2         | 626.02 ± 26.1         |
|                | Src(9,0)         | 151 ± 2.24        | 4.15 ± 0.02        | 1.68 ± 0.04        | 632.61 ± 9.79         |
|                | <b>Src(9,14)</b> | <b>151 ± 4.47</b> | <b>4.18 ± 0.07</b> | <b>1.43 ± 0.21</b> | <b>620.46 ± 23.43</b> |
| Max Mean       | Src(0,0)         | 219 ± 1           | 4.21 ± 0.19        | 42.41 ± 72.38      | 86.39 ± 2.04          |
|                | Src(0,14)        | 221 ± 0           | 4.03 ± 0.02        | 5.69 ± 1.35        | 79.9 ± 1.79           |
|                | Src(4,7)         | 221 ± 0           | 4.39 ± 0.16        | 5.4 ± 0.41         | 77.83 ± 0.84          |
|                | Src(9,0)         | 221 ± 0           | 5.18 ± 0.03        | 2.84 ± 0.22        | 79.99 ± 0.23          |
|                | Src(9,14)        | 223 ± 0           | 4.27 ± 0.12        | 6.67 ± 1.62        | 71.31 ± 3.48          |
| Max VarMaxMean | Src(0,0)         | 213 ± 4.12        | 4.14 ± 0.13        | 4.49 ± 0.24        | 143.54 ± 25.95        |
|                | Src(0,14)        | 207 ± 11.66       | 4.06 ± 0.09        | 4.24 ± 0.33        | 193.91 ± 92.48        |
|                | Src(4,7)         | 214 ± 1.41        | 4.34 ± 0.09        | 4.62 ± 0.26        | 141.27 ± 16.72        |
|                | Src(9,0)         | 198 ± 8.19        | 4.19 ± 0.05        | 4.71 ± 0.22        | 266.91 ± 74.04        |
|                | Src(9,14)        | 213 ± 7           | 4.15 ± 0.11        | 3.8 ± 0.59         | 144.14 ± 38.94        |
| Fixed Sweep    | <b>Src(0,0)</b>  | <b>36 ± 1</b>     | <b>4.28 ± 0.06</b> | <b>5.36 ± 0.76</b> | <b>68.19 ± 0.16</b>   |
|                | Src(0,14)        | 36 ± 0            | 4.17 ± 0.15        | 3.8 ± 0.44         | 68.03 ± 0.13          |
|                | Src(4,7)         | 36 ± 1            | 4.69 ± 0.28        | 4.87 ± 0.67        | 68.27 ± 0.14          |
|                | Src(9,0)         | 37 ± 0            | 5.35 ± 0.15        | 3.13 ± 0.66        | 68.09 ± 0.33          |
|                | Src(9,14)        | 37 ± 0            | 4.28 ± 0.13        | 4.6 ± 0.51         | 68.2 ± 0.18           |

TABLE SIV

PERFORMANCE METRICS FOR VARIANTS WITH INITIAL RANDOM WALK  
SCENARIO WITH SIGNAL PROPAGATION EXPONENT N=2.

| Approach     | Source location | Samples           | Rmse               | Variance               | Cumulative Distance   |
|--------------|-----------------|-------------------|--------------------|------------------------|-----------------------|
| Alpha 0.75   | Src(0,0)        | 199 ± 13.3        | 4.27 ± 0.19        | 68.25 ± 112.89         | 196.9 ± 50.99         |
|              | Src(0,14)       | 220 ± 7.94        | 3.98 ± 0.09        | 13.05 ± 4.11           | 100.6 ± 36.8          |
|              | Src(4,7)        | 218 ± 6.56        | 4.38 ± 0.2         | 14.56 ± 2.95           | 115.08 ± 47.51        |
|              | Src(9,0)        | 210 ± 10.54       | 4.21 ± 0.09        | 10.85 ± 2.14           | 169.41 ± 81.29        |
|              | Src(9,14)       | 223 ± 3.16        | 4.25 ± 0.1         | 9.01 ± 0.91            | 81.23 ± 20.35         |
| Alpha 0.5    | Src(0,0)        | 188 ± 17.69       | 4.11 ± 0.11        | 10.27 ± 0.44           | 337.03 ± 134.12       |
|              | Src(0,14)       | 194 ± 19.85       | 4.0 ± 0.11         | 8.15 ± 1.14            | 251.15 ± 117.29       |
|              | Src(4,7)        | 198 ± 4.24        | 4.23 ± 0.09        | 8.27 ± 3.82            | 248.43 ± 25           |
|              | Src(9,0)        | 205 ± 6.48        | 4.13 ± 0.12        | 8.56 ± 0.92            | 211.47 ± 53.82        |
|              | Src(9,14)       | 196 ± 15          | 4.1 ± 0.08         | 9.22 ± 2.33            | 279.89 ± 126.59       |
| Alpha 0.25   | Src(0,0)        | 170 ± 11.05       | 4.03 ± 0.03        | 4.22 ± 0.16            | 452.7 ± 58.65         |
|              | Src(0,14)       | 163 ± 10.25       | 3.99 ± 0.06        | 3.95 ± 0.39            | 499.61 ± 91.77        |
|              | Src(4,7)        | 166 ± 3.32        | 4.07 ± 0.06        | 3.21 ± 0.16            | 513.1 ± 30.55         |
|              | Src(9,0)        | 173 ± 9.22        | 4.11 ± 0.06        | 4.03 ± 0.06            | 432.53 ± 64.13        |
|              | Src(9,14)       | 179 ± 9.85        | 4.1 ± 0.06         | 3.84 ± 0.21            | 409.81 ± 81.41        |
| Max Variance | Src(0,0)        | 145 ± 2.83        | 4.04 ± 0.07        | 1.71 ± 0.19            | 706.65 ± 20.44        |
|              | Src(0,14)       | 145 ± 1.41        | 4.0 ± 0.07         | 1.5 ± 0.14             | 714.51 ± 8.47         |
|              | Src(4,7)        | 142 ± 2           | 4.15 ± 0.07        | 1.88 ± 0.1             | 718.65 ± 25.38        |
|              | Src(9,0)        | 141 ± 5.83        | 1.77 ± 0.17        | 1.77 ± 0.17            | 709.49 ± 16.47        |
|              | Src(9,14)       | 141 ± 3.87        | 4.09 ± 0.09        | 1.64 ± 0.13            | 708.95 ± 12.11        |
| Max Mean     | <b>Src(0,0)</b> | <b>218 ± 3.74</b> | <b>4.67 ± 0.41</b> | <b>310.41 ± 155.91</b> | <b>102.49 ± 23.41</b> |
|              | Src(0,14)       | 227 ± 0           | 4.43 ± 0.34        | 17.99 ± 4.97           | 60.72 ± 0.92          |
|              | Src(4,7)        | 223 ± 2.24        | 126.23 ± 117.88    | 79.15 ± 17.39          | 84.8 ± 31.34          |
|              | Src(9,0)        | 223 ± 3.46        | 5.46 ± 1.05        | 33.07 ± 55.04          | 63.38 ± 2.25          |

TABLE SV

PERFORMANCE METRICS IN MULTI-ROBOT FIXED VORONOI PARTITION (FVP) SCENARIOS.

| Approach      | Source location  | Samples            | Rmse               | Variance            | Distance              |
|---------------|------------------|--------------------|--------------------|---------------------|-----------------------|
| Alpha0.75     | <b>Src(0,0)</b>  | <b>427 ± 26.32</b> | <b>4.15 ± 0.05</b> | <b>8.25 ± 1.06</b>  | <b>147.61 ± 22.12</b> |
|               | Src(0,14)        | 413 ± 42.11        | 3.96 ± 0.07        | 7.39 ± 0.82         | 207.91 ± 27.87        |
|               | Src(4,7)         | 443 ± 40.07        | 4.14 ± 0.16        | 14.36 ± 2.27        | 99.02 ± 8.41          |
|               | <b>Src(9,0)</b>  | <b>423 ± 23.52</b> | <b>4.21 ± 0.07</b> | <b>8.71 ± 1.24</b>  | <b>137.31 ± 15.42</b> |
|               | Src(9,14)        | 426 ± 31.46        | 4.08 ± 0.04        | 10.19 ± 0.93        | 153.77 ± 13.46        |
| Alpha0.5      | <b>Src(0,0)</b>  | <b>392 ± 11.49</b> | <b>4.17 ± 0.02</b> | <b>5.15 ± 0.37</b>  | <b>226.44 ± 34.79</b> |
|               | Src(0,14)        | 368 ± 14.66        | 3.96 ± 0.08        | 4.85 ± 0.67         | 316.08 ± 17.68        |
|               | Src(4,7)         | 419 ± 13.6         | 3.97 ± 0.06        | 9.11 ± 0.65         | 148.17 ± 16.5         |
|               | <b>Src(9,0)</b>  | <b>426 ± 31.98</b> | <b>4.08 ± 0.1</b>  | <b>6.0 ± 0.5</b>    | <b>232.51 ± 15.78</b> |
|               | Src(9,14)        | 410 ± 51.71        | 4.05 ± 0.04        | 7.49 ± 0.66         | 200.52 ± 12.75        |
| Alpha0.25     | <b>Src(0,0)</b>  | <b>341 ± 7.55</b>  | <b>4.14 ± 0.05</b> | <b>3.05 ± 0.23</b>  | <b>396.0 ± 18.19</b>  |
|               | Src(0,14)        | 333 ± 5.74         | 3.87 ± 0.03        | 3.32 ± 0.3          | 404.58 ± 19.24        |
|               | Src(4,7)         | 400 ± 26.68        | 4.03 ± 0.09        | 4.47 ± 0.24         | 269.8 ± 21.18         |
|               | <b>Src(9,0)</b>  | <b>359 ± 32.48</b> | <b>4.04 ± 0.04</b> | <b>3.88 ± 0.2</b>   | <b>301.65 ± 30.46</b> |
|               | Src(9,14)        | 373 ± 16.79        | 4.03 ± 0.04        | 4.64 ± 0.32         | 288.09 ± 10.16        |
| MaxVar        | <b>Src(0,0)</b>  | <b>233 ± 4.36</b>  | <b>4.07 ± 0.02</b> | <b>1.82 ± 0.12</b>  | <b>591.97 ± 11.31</b> |
|               | Src(0,14)        | 237 ± 4.47         | 3.9 ± 0.03         | 1.85 ± 0.1          | 589.39 ± 7.57         |
|               | Src(4,7)         | 241 ± 1.41         | 4.01 ± 0.05        | 2.04 ± 0.07         | 594.53 ± 4.32         |
|               | <b>Src(9,0)</b>  | <b>235 ± 3.74</b>  | <b>4.07 ± 0.04</b> | <b>1.81 ± 0.09</b>  | <b>592.34 ± 10.7</b>  |
|               | Src(9,14)        | 233 ± 3.74         | 4.06 ± 0.03        | 1.84 ± 0.11         | 596.3 ± 5.61          |
| MaxMean       | <b>Src(0,0)</b>  | <b>451 ± 28.58</b> | <b>5.47 ± 1.2</b>  | <b>13.17 ± 0.77</b> | <b>62.97 ± 8.44</b>   |
|               | <b>Src(0,14)</b> | <b>495 ± 50.08</b> | <b>5.29 ± 1</b>    | <b>10.44 ± 3.45</b> | <b>80.98 ± 10.35</b>  |
|               | Src(4,7)         | 438 ± 32.28        | 5.3 ± 0.72         | 24.68 ± 2.81        | 52.73 ± 2.59          |
|               | Src(9,0)         | 426 ± 26.65        | 4.48 ± 0.09        | 19.15 ± 1.68        | 58.08 ± 8.81          |
|               | Src(9,14)        | 418 ± 35.83        | 4.3 ± 0.06         | 17.92 ± 2.68        | 89.22 ± 14.13         |
| MaxVarMaxMean | <b>Src(0,0)</b>  | <b>385 ± 25.63</b> | <b>4.14 ± 0.05</b> | <b>4.12 ± 0.22</b>  | <b>226.57 ± 17.21</b> |
|               | Src(0,14)        | 367 ± 30.53        | 3.99 ± 0.05        | 4.15 ± 0.3          | 240.89 ± 19.71        |
|               | Src(4,7)         | 390 ± 33.78        | 4.05 ± 0.05        | 4.3 ± 0.17          | 265.15 ± 21.57        |
|               | <b>Src(9,0)</b>  | <b>381 ± 30.4</b>  | <b>4.1 ± 0.07</b>  | <b>4.17 ± 0.24</b>  | <b>244.34 ± 30.61</b> |
|               | Src(9,14)        | 360 ± 10.34        | 4.01 ± 0.08        | 4.27 ± 0.16         | 274.0 ± 23.08         |
| RW            | <b>Src(0,0)</b>  | <b>206 ± 7.68</b>  | <b>4.73 ± 0.09</b> | <b>4.41 ± 0.49</b>  | <b>513.45 ± 5.02</b>  |
|               | <b>Src(0,14)</b> | <b>208 ± 4.36</b>  | <b>4.81 ± 0.21</b> | <b>4.36 ± 0.48</b>  | <b>512.87 ± 7.79</b>  |
|               | Src(4,7)         | 201 ± 4.69         | 4.11 ± 0.08        | 6.94 ± 0.66         | 518.83 ± 2.46         |
|               | Src(9,0)         | 201 ± 4.12         | 4.89 ± 0.48        | 4.42 ± 0.88         | 515.89 ± 4.42         |
|               | Src(9,14)        | 205 ± 6.24         | 5.32 ± 0.14        | 3.58 ± 0.45         | 512.06 ± 6.01         |

TABLE SVI

PERFORMANCE METRICS FOR MULTI-ROBOT DYNAMIC VORONOI PARTITION (DVP) SCENARIOS.

| Approach      | Source location  | Samples            | Rmse               | Variance            | Distance              |
|---------------|------------------|--------------------|--------------------|---------------------|-----------------------|
| Alpha0.75     | <b>Src(0,0)</b>  | <b>440 ± 22.52</b> | <b>4.12 ± 0.02</b> | <b>8.75 ± 0.99</b>  | <b>93.36 ± 14.12</b>  |
|               | Src(0,14)        | 459 ± 37.76        | 4.14 ± 0.12        | 10.49 ± 2.04        | 90.44 ± 16.39         |
|               | Src(4,7)         | 533 ± 44.47        | 4.05 ± 0.07        | 11.49 ± 2.64        | 87.69 ± 13.62         |
|               | <b>Src(9,0)</b>  | <b>442 ± 32.88</b> | <b>4.13 ± 0.06</b> | <b>9.74 ± 1.53</b>  | <b>90.04 ± 15.02</b>  |
|               | Src(9,14)        | 443 ± 42.84        | 4.34 ± 0.21        | 10.0 ± 1.09         | 86.46 ± 20.69         |
| Alpha0.5      | Src(0,0)         | 406 ± 40.61        | 4.17 ± 0.05        | 8.01 ± 0.81         | 118.03 ± 11.78        |
|               | Src(0,14)        | 414 ± 31.24        | 4.07 ± 0.09        | 8.28 ± 0.38         | 121.39 ± 14.43        |
|               | Src(4,7)         | 395 ± 37.07        | 3.98 ± 0.06        | 8.38 ± 1.18         | 123.42 ± 9.97         |
|               | Src(9,0)         | 420 ± 46.97        | 4.08 ± 0.04        | 7.79 ± 1.19         | 120.66 ± 13.28        |
|               | Src(9,14)        | 405 ± 33.91        | 4.18 ± 0.06        | 7.83 ± 0.91         | 118.63 ± 7.72         |
| Alpha0.25     | <b>Src(0,0)</b>  | <b>401 ± 21.75</b> | <b>4.14 ± 0.09</b> | <b>4.56 ± 0.35</b>  | <b>201.79 ± 32.02</b> |
|               | Src(0,14)        | 370 ± 42           | 4.02 ± 0.08        | 4.53 ± 0.37         | 216.35 ± 20.26        |
|               | Src(4,7)         | 361 ± 27.51        | 3.97 ± 0.04        | 3.98 ± 0.28         | 241.62 ± 21.72        |
|               | <b>Src(9,0)</b>  | <b>385 ± 19.05</b> | <b>4.11 ± 0.02</b> | <b>4.64 ± 0.53</b>  | <b>214.91 ± 39.74</b> |
|               | Src(9,14)        | 393 ± 37.32        | 4.15 ± 0.06        | 4.78 ± 0.33         | 221.14 ± 13.03        |
| MaxVar        | Src(0,0)         | 249 ± 5.92         | 4.05 ± 0.03        | 1.72 ± 0.09         | 564.67 ± 7.72         |
|               | <b>Src(0,14)</b> | <b>242 ± 10.54</b> | <b>3.94 ± 0.1</b>  | <b>1.82 ± 0.28</b>  | <b>514.68 ± 78.59</b> |
|               | Src(4,7)         | 240 ± 17.35        | 4.0 ± 0.05         | 2.22 ± 0.27         | 521.85 ± 54.78        |
|               | <b>Src(9,0)</b>  | <b>241 ± 7</b>     | <b>4.06 ± 0.04</b> | <b>1.83 ± 0.13</b>  | <b>547.96 ± 15.25</b> |
|               | Src(9,14)        | 246 ± 5.57         | 3.98 ± 0.03        | 1.73 ± 0.13         | 542.95 ± 18.25        |
| MaxMean       | Src(0,0)         | 457 ± 18.25        | 4.72 ± 0.41        | 16.03 ± 2.46        | 57.65 ± 5.13          |
|               | <b>Src(0,14)</b> | <b>450 ± 18.95</b> | <b>4.15 ± 0.1</b>  | <b>15.3 ± 1.68</b>  | <b>75.75 ± 6.78</b>   |
|               | Src(4,7)         | 457 ± 32.82        | 5.32 ± 0.63        | 57.51 ± 66.1        | 48.65 ± 3.88          |
|               | Src(9,0)         | 427 ± 33.2         | 4.25 ± 0.09        | 17.42 ± 4.07        | 63.51 ± 5.8           |
|               | <b>Src(9,14)</b> | <b>430 ± 26.76</b> | <b>4.33 ± 0.11</b> | <b>14.11 ± 1.05</b> | <b>69.14 ± 7.03</b>   |
| MaxVarMaxMean | <b>Src(0,0)</b>  | <b>410 ± 16.76</b> | <b>4.15 ± 0.03</b> | <b>4.23 ± 0.23</b>  | <b>226.57 ± 40.15</b> |
|               | Src(0,14)        | 400 ± 44.33        | 3.97 ± 0.07        | 4.49 ± 0.27         | 241.57 ± 36.57        |
|               | Src(4,7)         | 389 ± 22.45        | 4.03 ± 0.09        | 4.5 ± 0.25          | 244.56 ± 16.75        |
|               | <b>Src(9,0)</b>  | <b>412 ± 37.13</b> | <b>4.09 ± 0.07</b> | <b>4.18 ± 0.27</b>  | <b>231.55 ± 15.98</b> |
|               | Src(9,14)        | 430 ± 46.38        | 4.12 ± 0.03        | 4.31 ± 0.09         | 225.17 ± 25.66        |
| RW            | <b>Src(0,0)</b>  | <b>204 ± 9.43</b>  | <b>4.68 ± 0.07</b> | <b>3.18 ± 0.39</b>  | <b>495.62 ± 27.34</b> |
|               | <b>Src(0,14)</b> | <b>204 ± 6.32</b>  | <b>4.86 ± 0.2</b>  | <b>2.86 ± 0.22</b>  | <b>488.74 ± 23.65</b> |
|               | Src(4,7)         | 207 ± 11.96        | 4.03 ± 0.04        | 5.28 ± 0.35         | 509.44 ± 21.2         |
|               | Src(9,0)         | 217 ± 18.19        | 5.0 ± 0.29         | 3.22 ± 0.57         | 499.83 ± 13.28        |
|               | Src(9,14)        | 221 ± 36.63        | 4.7 ± 0.26         | 4.0 ± 0.81          | 434.82 ± 144.25       |

TABLE SVII

SUMMARY OF PERFORMANCE METRICS FOR INITIAL FIXED SWEEP SCENARIO WITH N=3.

| FS Scenario n=3 | Samples           | RMSE               | Variance             | Cumulative Distance   |
|-----------------|-------------------|--------------------|----------------------|-----------------------|
| Alpha75         | 219 ± 4           | 4.27 ± 0.15        | 11.23 ± 9.93         | 93.15 ± 25.59         |
| <b>Alpha50</b>  | <b>207 ± 8.66</b> | <b>4.19 ± 0.09</b> | <b>13.45 ± 10.97</b> | <b>168.33 ± 60.57</b> |
| <b>Alpha25</b>  | <b>182 ± 7.42</b> | <b>4.13 ± 0.08</b> | <b>5.56 ± 0.51</b>   | <b>365.95 ± 63.34</b> |
| MaxVar          | 153 ± 2           | 4.18 ± 0.17        | 2.48 ± 0.33          | 618.33 ± 16.78        |
| MaxMean         | 222 ± 0           | 4.71 ± 0.49        | 32.09 ± 46.63        | 78.63 ± 4.9           |
| MaxVarMaxMean   | 177 ± 15.39       | 4.24 ± 0.17        | 4.92 ± 0.97          | 425.45 ± 115.94       |
| FS              | 36 ± 1            | 4.82 ± 0.66        | 7.12 ± 2.13          | 68.32 ± 0.64          |

TABLE SVIII

SUMMARY OF PERFORMANCE METRICS FOR INITIAL RANDOM WALK SCENARIO WITH N=3.

| RW Scenario n=3 | Samples            | RMSE               | Variance             | Cumulative Distance   |
|-----------------|--------------------|--------------------|----------------------|-----------------------|
| Alpha75         | 205 ± 14.66        | 4.33 ± 0.35        | 26.27 ± 14.27        | 175.2 ± 75.87         |
| <b>Alpha50</b>  | <b>194 ± 12.61</b> | <b>4.23 ± 0.1</b>  | <b>16.13 ± 10.27</b> | <b>284.8 ± 91.59</b>  |
| <b>Alpha25</b>  | <b>168 ± 7.68</b>  | <b>4.11 ± 0.07</b> | <b>5.73 ± 0.57</b>   | <b>494.11 ± 70.57</b> |
| MaxVar          | 145 ± 3.46         | 4.18 ± 0.1         | 2.49 ± 0.29          | 696.28 ± 16.86        |
| MaxMean         | 226 ± 1            | 6.06 ± 1.1         | 37.84 ± 44.57        | 61.44 ± 4.94          |
| MaxVarMaxMean   | 170 ± 10.63        | 4.2 ± 0.11         | 4.97 ± 0.54          | 489.65 ± 89.8         |
| RW              | 150 ± 1            | 4.45 ± 0.22        | 3.1 ± 0.94           | 520.94 ± 6.34         |

TABLE SIX

SUMMARY OF PERFORMANCE METRICS FOR INITIAL FIXED SWEEP SCENARIO WITH N=2.

| FS Variants n=2 | Samples            | Rmse               | Variance           | Cumulative Distance   |
|-----------------|--------------------|--------------------|--------------------|-----------------------|
| Alpha75         | 220 ± 2.45         | 4.18 ± 0.13        | 6.19 ± 2.19        | 86.51 ± 18.35         |
| <b>Alpha50</b>  | <b>213 ± 6</b>     | <b>4.16 ± 0.11</b> | <b>5.55 ± 1.69</b> | <b>127.22 ± 40</b>    |
| <b>Alpha25</b>  | <b>188 ± 10.05</b> | <b>4.04 ± 0.08</b> | <b>3.72 ± 0.52</b> | <b>310.39 ± 80.73</b> |
| MaxVar          | 151 ± 3.46         | 4.1 ± 0.1          | 1.64 ± 0.24        | 625.17 ± 20.06        |
| MaxMean         | 221 ± 1.41         | 4.42 ± 0.42        | 12.6 ± 35.67       | 79.09 ± 5.23          |
| MaxVarMaxMean   | 209 ± 9.54         | 4.18 ± 0.14        | 4.37 ± 0.48        | 177.95 ± 75.3         |
| FS              | 36 ± 1             | 4.55 ± 0.47        | 4.35 ± 1.01        | 68.16 ± 0.22          |

TABLE SX

SUMMARY OF PERFORMANCE METRICS FOR INITIAL RANDOM WALK SCENARIO WITH N=2.

| RW Variants n=2 | Samples            | Rmse               | Variance           | Cumulative Distance    |
|-----------------|--------------------|--------------------|--------------------|------------------------|
| Alpha75         | 214 ± 12.37        | 4.22 ± 0.2         | 23.15 ± 55.38      | 132.64 ± 67.37         |
| <b>Alpha50</b>  | <b>196 ± 15.13</b> | <b>4.12 ± 0.13</b> | <b>8.89 ± 2.25</b> | <b>265.59 ± 109.57</b> |
| <b>Alpha25</b>  | <b>170 ± 10.68</b> | <b>4.06 ± 0.07</b> | <b>3.85 ± 0.41</b> | <b>461.55 ± 79.04</b>  |
| MaxVar          | 143 ± 4            | 4.09 ± 0.1         | 1.7 ± 0.2          | 711.65 ± 18.14         |
| MaxMean         | 223 ± 3.87         | 5.17 ± 1.09        | 98.82 ± 145.73     | 78.11 ± 24.49          |
| MaxVarMaxMean   | 188 ± 16.61        | 4.12 ± 0.11        | 4.83 ± 0.58        | 352.52 ± 120.86        |
| RW              | 149 ± 1            | 4.26 ± 0.2         | 1.9 ± 0.44         | 521.11 ± 6.45          |

TABLE SXI

SUMMARY OF PERFORMANCE METRICS FOR MULTI-ROBOT FIXED VORONOI PARTITIONING CASES WITH N=3.

| FVP Scenario   | Samples            | RMSE              | Variance           | Cumulative Distance   |
|----------------|--------------------|-------------------|--------------------|-----------------------|
| Alpha75        | 426 ± 34.81        | 4.11 ± 0.12       | 9.78 ± 2.82        | 149.12 ± 39.72        |
| <b>Alpha50</b> | <b>403 ± 35.76</b> | <b>4.05 ± 0.1</b> | <b>6.52 ± 1.69</b> | <b>224.74 ± 58.42</b> |
| <b>Alpha25</b> | <b>361 ± 31.51</b> | <b>4.02 ± 0.1</b> | <b>3.87 ± 0.68</b> | <b>332.02 ± 60.44</b> |
| MaxVar         | 236 ± 5            | 4.02 ± 0.07       | 1.87 ± 0.13        | 592.91 ± 8.69         |
| MaxMean        | 445 ± 44.78        | 4.97 ± 0.91       | 17.07 ± 5.91       | 68.8 ± 16.94          |
| MaxVarMaxMean  | 377 ± 29.65        | 4.06 ± 0.08       | 4.2 ± 0.23         | 250.19 ± 28.6         |
| RW             | 204 ± 6.24         | 4.77 ± 0.46       | 4.74 ± 1.3         | 514.62 ± 5.96         |

TABLE SXII

SUMMARY OF PERFORMANCE METRICS FOR MULTI-ROBOT DYNAMIC VORONOI PARTITIONING CASES WITH N=3.

| DVP Scenario   | Samples            | RMSE              | Variance           | Cumulative Distance   |
|----------------|--------------------|-------------------|--------------------|-----------------------|
| Alpha75        | 463 ± 51.11        | 4.16 ± 0.15       | 10.1 ± 1.98        | 89.6 ± 16.35          |
| <b>Alpha50</b> | <b>408 ± 39.29</b> | <b>4.1 ± 0.1</b>  | <b>8.06 ± 0.97</b> | <b>120.42 ± 11.84</b> |
| <b>Alpha25</b> | <b>382 ± 34.22</b> | <b>4.08 ± 0.1</b> | <b>4.5 ± 0.47</b>  | <b>219.16 ± 29.98</b> |
| MaxVar         | 244 ± 10.72        | 4.01 ± 0.07       | 1.86 ± 0.27        | 538.42 ± 47.83        |
| MaxMean        | 444 ± 29.83        | 4.55 ± 0.55       | 24.08 ± 34.05      | 62.94 ± 11            |
| MaxVarMaxMean  | 408 ± 37.96        | 4.07 ± 0.09       | 4.34 ± 0.27        | 233.89 ± 29.84        |
| RW             | 211 ± 20.95        | 4.65 ± 0.39       | 3.71 ± 1.01        | 485.69 ± 72.39        |

TABLE SXIII  
SOURCE LOCALIZATION MEAN ACCURACY (%) BY ALL APPROACHES.

|                   |           | Samples            | Alpha75    | Alpha50    | Alpha25    | MaxVar     | MaxMean   | MaxVarMaxMean | RW/FS     |
|-------------------|-----------|--------------------|------------|------------|------------|------------|-----------|---------------|-----------|
| Singe robot cases | FS (n=2)  | 10                 | 28         | 24         | 24         | 20         | 20        | 24            | 20        |
|                   |           | 25                 | 32         | 40         | 40         | 40         | 36        | 40            | 36        |
|                   |           | <b>35</b>          | <b>84</b>  | 72         | 72         | 68         | 68        | 64            |           |
|                   |           | <b>45</b>          | <b>88</b>  | <b>100</b> | <b>96</b>  | <b>88</b>  | <b>72</b> | <b>88</b>     |           |
|                   |           | 50                 | 88         | 100        | 96         | 100        | 72        | 92            |           |
|                   |           | After half samples | 100        | 100        | 100        | 100        | 72        | 92            | 44        |
|                   |           | After last sample  | 100        | 100        | 100        | 100        | 72        | 92            | 76        |
|                   | FS (n=3)  | 10                 | 24         | 32         | 28         | 28         | 32        | 28            | 24        |
|                   |           | 25                 | 40         | 32         | 24         | 40         | 32        | 32            | 28        |
|                   |           | <b>35</b>          | <b>84</b>  | 68         | 68         | 72         | 68        | 76            |           |
|                   |           | <b>45</b>          | <b>100</b> | <b>100</b> | <b>100</b> | <b>92</b>  | <b>72</b> | <b>96</b>     |           |
|                   |           | 50                 | 100        | 100        | 100        | 92         | 72        | 92            |           |
|                   |           | After half samples | 100        | 100        | 100        | 96         | 72        | 96            | 48        |
|                   |           | After last sample  | 100        | 100        | 100        | 100        | 72        | 100           | 68        |
|                   | RW (n=2)  | 10                 | 40         | 32         | 44         | 44         | 32        | 44            | 32        |
|                   |           | <b>25</b>          | <b>96</b>  | <b>100</b> | <b>100</b> | <b>100</b> | 72        | <b>100</b>    | 64        |
|                   |           | <b>35</b>          | <b>100</b> | <b>100</b> | <b>100</b> | <b>96</b>  | 72        | <b>100</b>    | 68        |
|                   |           | 45                 | 100        | 100        | 100        | 100        | 72        | 100           | 68        |
|                   |           | 50                 | 100        | 100        | 96         | 100        | 72        | 100           | 72        |
|                   |           | After half samples | 100        | 100        | 100        | 100        | 72        | 100           | 76        |
|                   |           | After last sample  | 100        | 100        | 100        | 100        | 72        | 100           | 100       |
|                   | RW (n=3)  | 10                 | 56         | 48         | 44         | 60         | 52        | 56            | 40        |
|                   |           | <b>25</b>          | <b>96</b>  | <b>96</b>  | <b>96</b>  | <b>100</b> | 56        | <b>100</b>    | 64        |
|                   |           | <b>35</b>          | <b>100</b> | <b>96</b>  | <b>96</b>  | <b>100</b> | 56        | <b>100</b>    | <b>80</b> |
|                   |           | 45                 | 100        | 96         | 100        | 100        | 56        | 100           | 80        |
|                   |           | 50                 | 100        | 100        | 100        | 100        | 56        | 100           | 80        |
|                   |           | After half samples | 100        | 100        | 100        | 100        | 56        | 100           | 80        |
|                   |           | After last sample  | 100        | 100        | 100        | 100        | 56        | 100           | 100       |
| Multi-robot cases | FVP (n=3) | 10                 | 40         | 40         | 32         | 36         | 36        | 48            | 48        |
|                   |           | <b>25</b>          | <b>96</b>  | <b>100</b> | <b>96</b>  | <b>96</b>  | 44        | <b>100</b>    | 64        |
|                   |           | 35                 | <b>100</b> | <b>100</b> | <b>100</b> | <b>100</b> | 56        | <b>100</b>    | 64        |
|                   |           | 45                 | 100        | 100        | 100        | 100        | 64        | 96            | 60        |
|                   |           | 50                 | 100        | 100        | 100        | 100        | 64        | 96            | 60        |
|                   |           | After half sample  | 100        | 100        | 100        | 100        | 76        | 100           | 60        |
|                   |           | After last sample  | 100        | 100        | 100        | 100        | 76        | 100           | 60        |
|                   | DVP (n=3) | 10                 | 36         | 40         | 28         | 32         | 32        | 40            | 48        |
|                   |           | <b>25</b>          | <b>100</b> | <b>100</b> | <b>100</b> | <b>92</b>  | 56        | <b>88</b>     | 56        |
|                   |           | <b>35</b>          | <b>100</b> | <b>100</b> | <b>100</b> | <b>96</b>  | 76        | <b>100</b>    | 56        |
|                   |           | 45                 | 100        | 100        | 100        | 96         | 88        | 100           | 60        |
|                   |           | 50                 | 100        | 100        | 100        | 96         | 92        | 100           | 60        |
|                   |           | After half samples | 100        | 100        | 100        | 100        | 96        | 100           | 60        |
|                   |           | After last sample  | 100        | 100        | 100        | 100        | 96        | 100           | 68        |

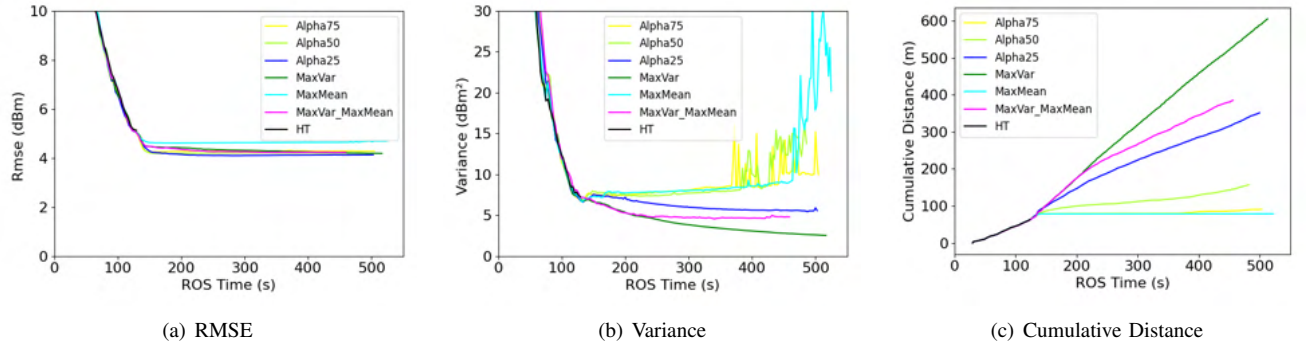

Figure S1. RMSE, Variance and Cumulative Distance for Fixed Sweep Variants for  $n=3$ .

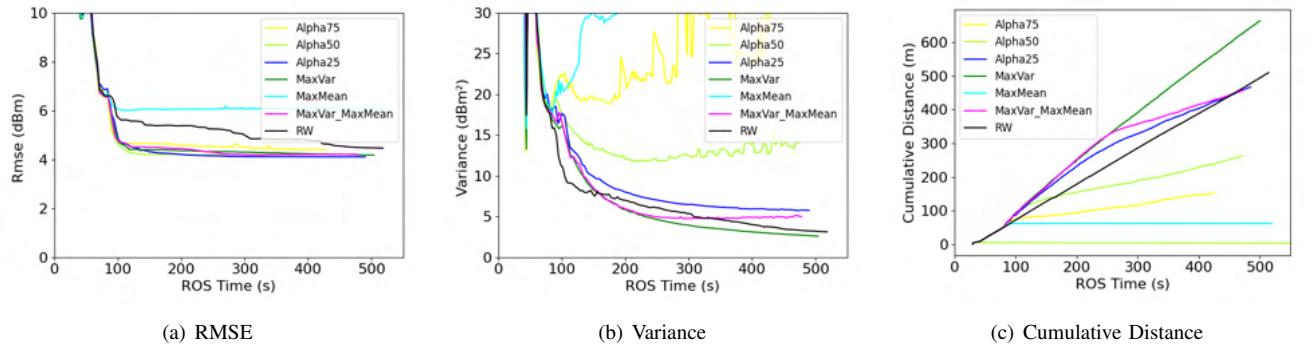

Figure S2. RMSE, Variance and Cumulative Distance for Random Walk Variants for  $n=3$ .

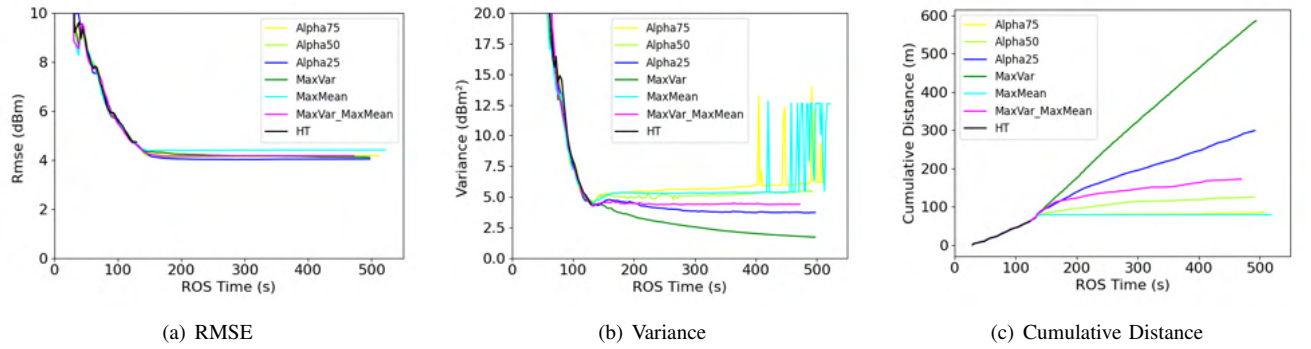

Figure S3. RMSE, Variance and Cumulative Distance for Hector Variants and  $n=2$ .

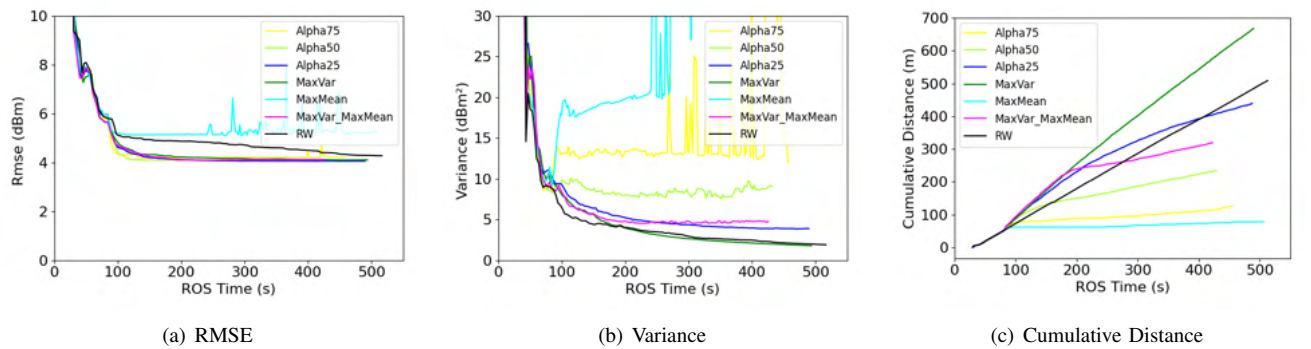

Figure S4. RMSE, Variance and Cumulative Distance for Random Walk Variants  $n=2$ .

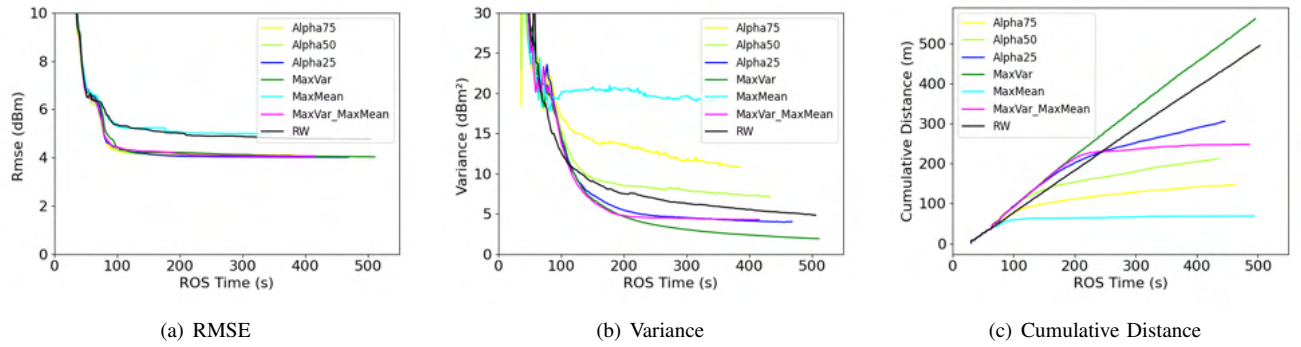

Figure S5. RMSE, Variance and Cumulative Distance for Multi-Robots in Fixed Voronoi Partitioning.

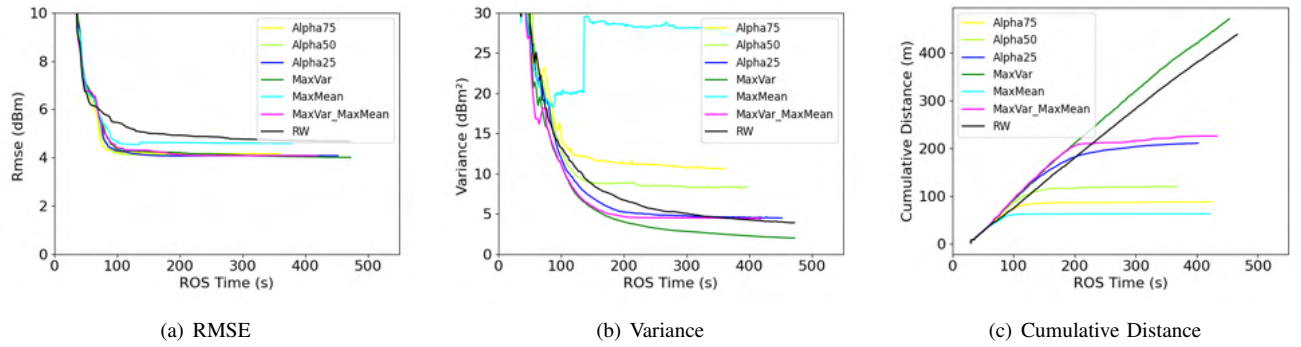

Figure S6. RMSE, Var and Cumulative Distance for Multi-Robots in Dynamic Voronoi Partitioning.

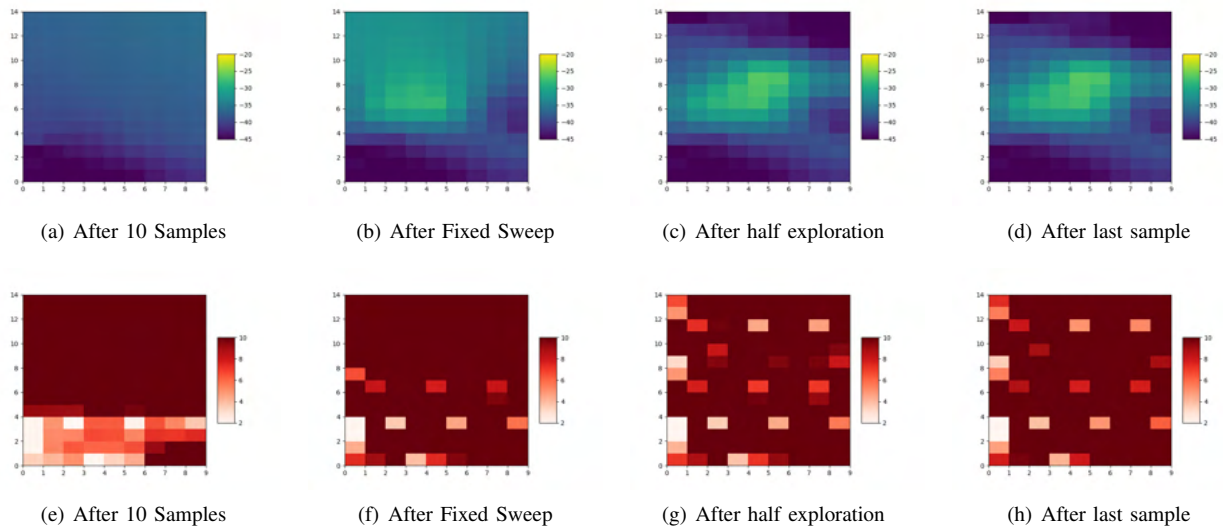

Figure S7. Mean and Variance for Fixed Sweep Baseline and Source location (4,7).

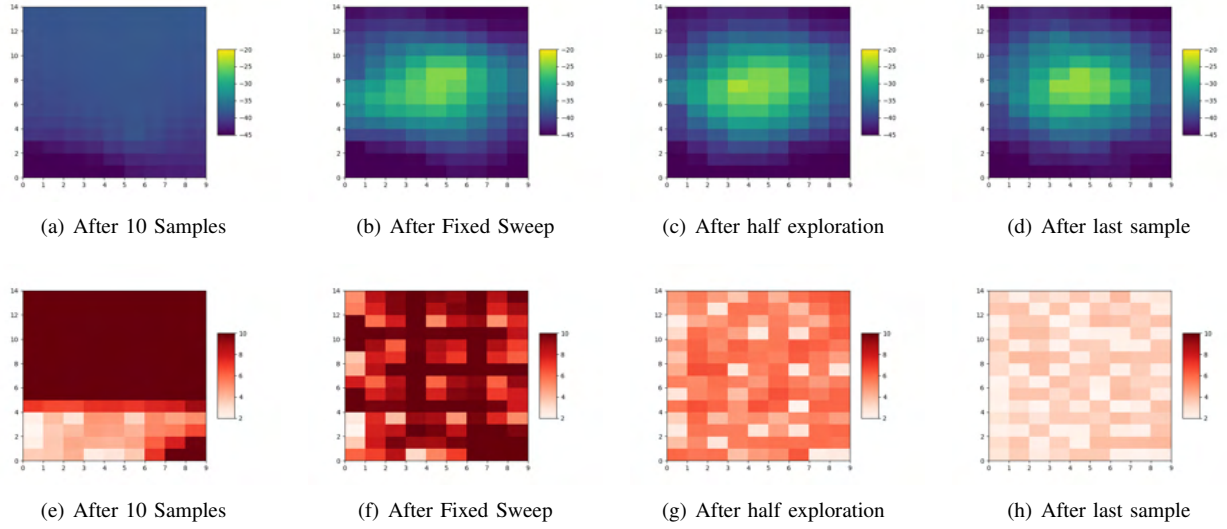

Figure S8. Fixed Sweep Scenario - Mean and Variance for MaxVar Approach and Source location (4,7)

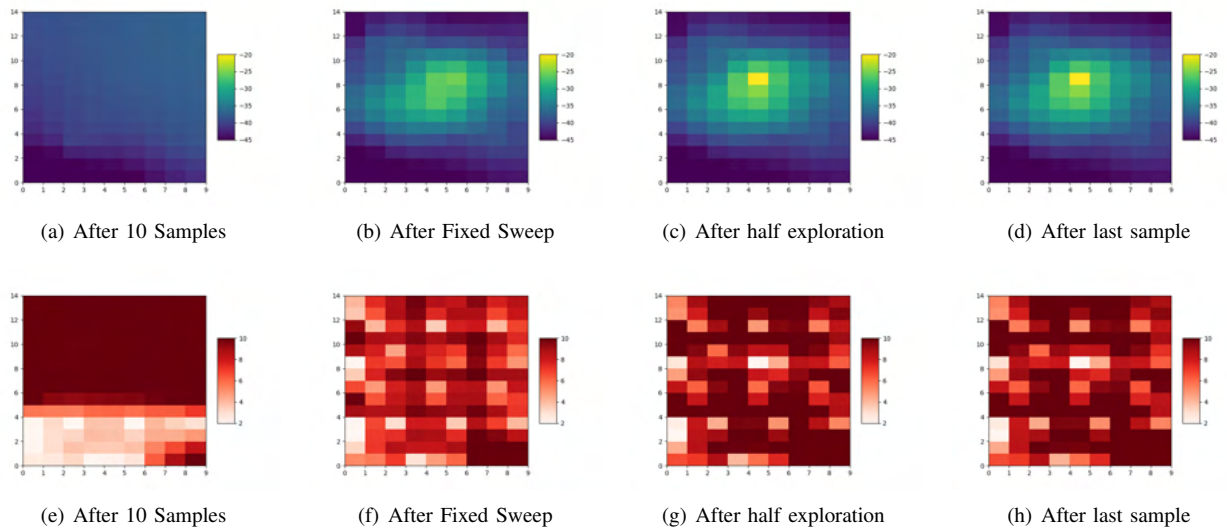

Figure S9. Fixed Sweep Scenario - Mean and Variance for MaxMean Approach and Source location (4,7)



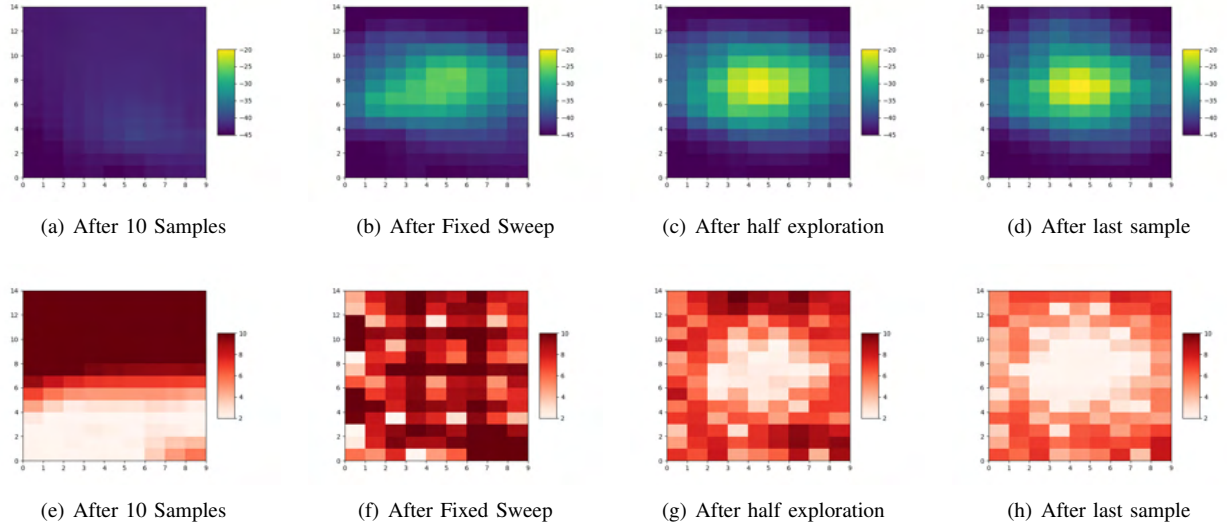

Figure S10. Fixed Sweep Scenario - Mean and Variance for Alpha0.25 Approach and Source location (4,7)

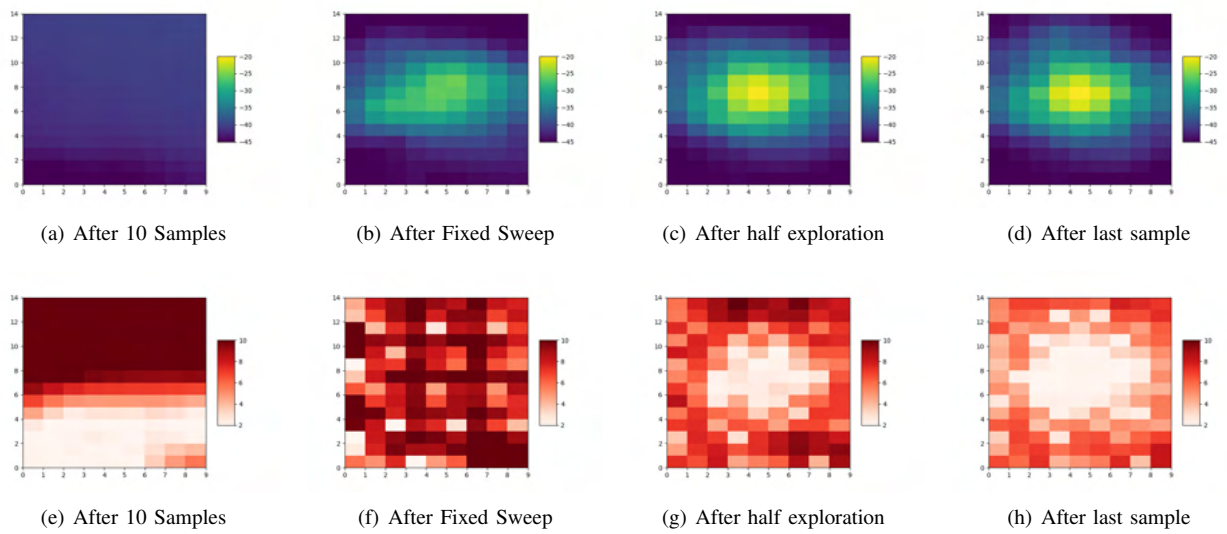

Figure S11. Fixed Sweep Scenario - Mean and Variance for Alpha0.5 Approach and Source location (4,7)

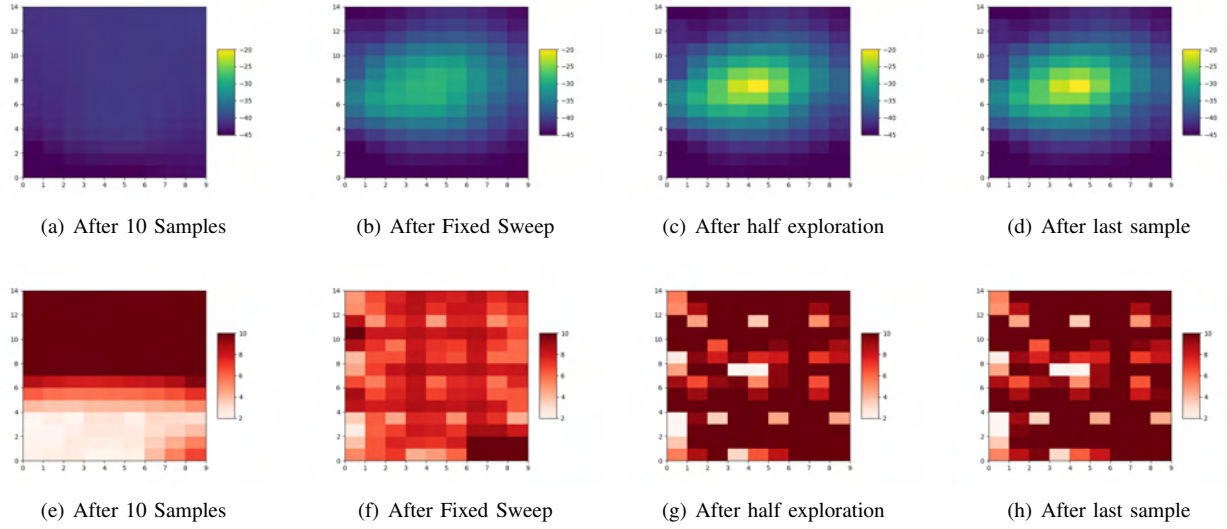

Figure S12. Fixed Sweep Scenario - Mean and Variance for Alpha0.75 Approach and Source location (4,7)

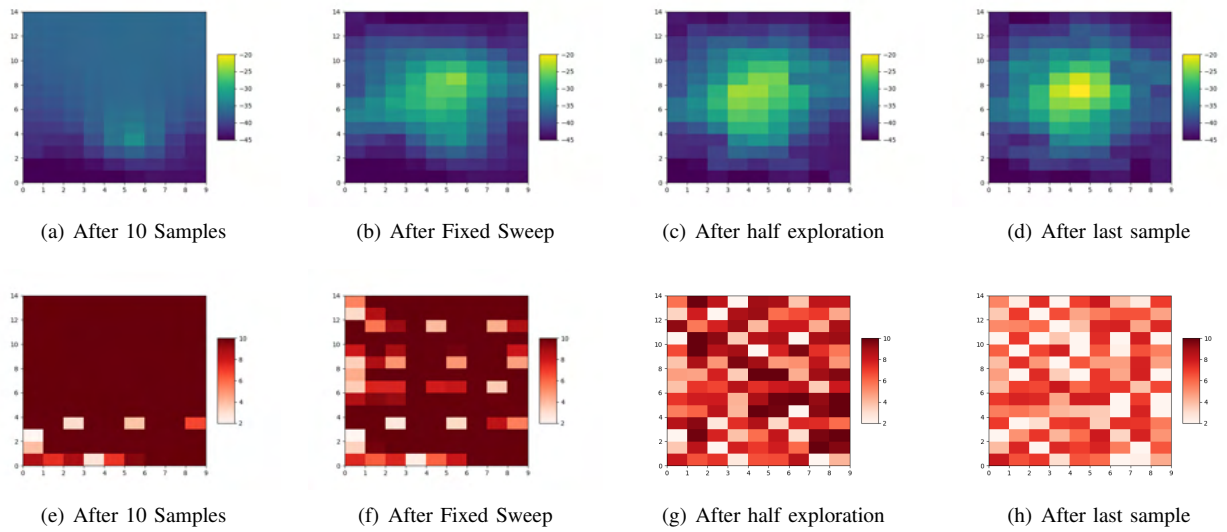

Figure S13. Fixed Sweep Scenario - Mean and Variance for MaxVarMaxMean Approach and Source location (4,7)



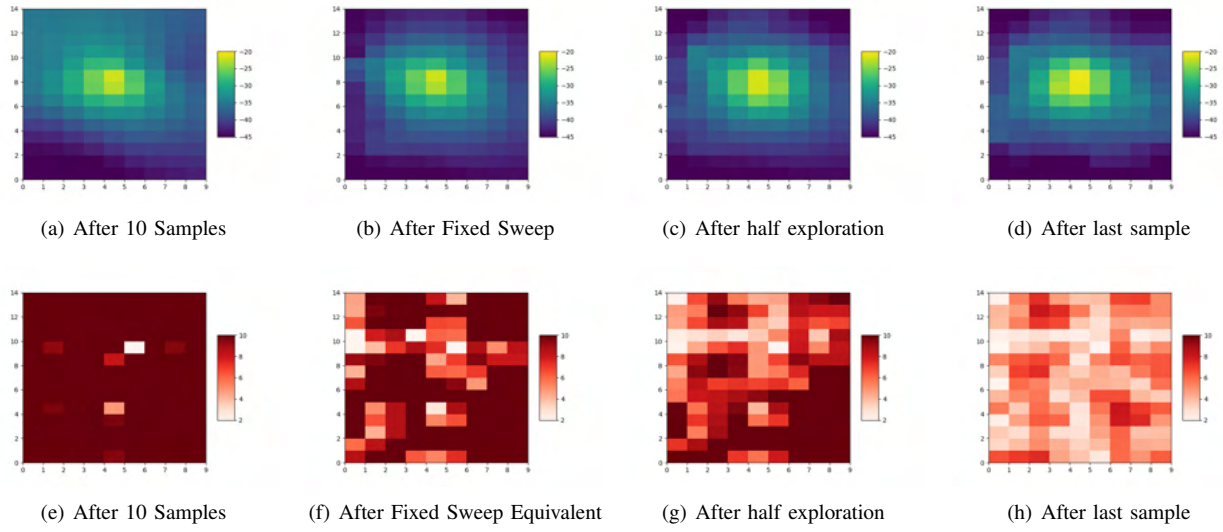

Figure S14. Mean and Variance for Random Walk Baseline and Source location (4,7).

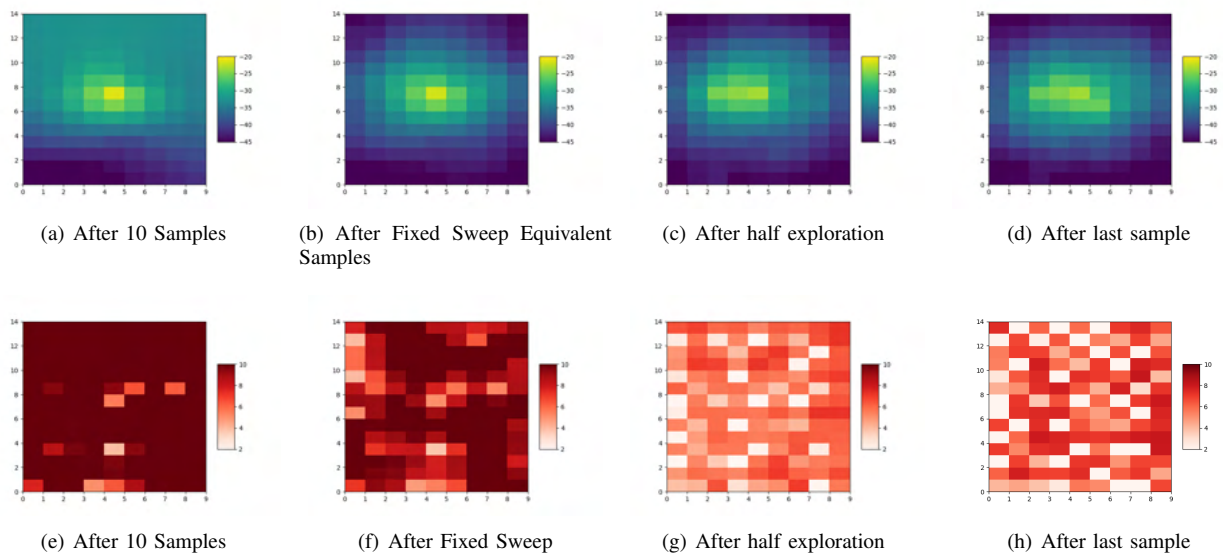

Figure S15. Random Walk Scenario - Mean and Variance for MaxVar Approach and Source location (4,7)

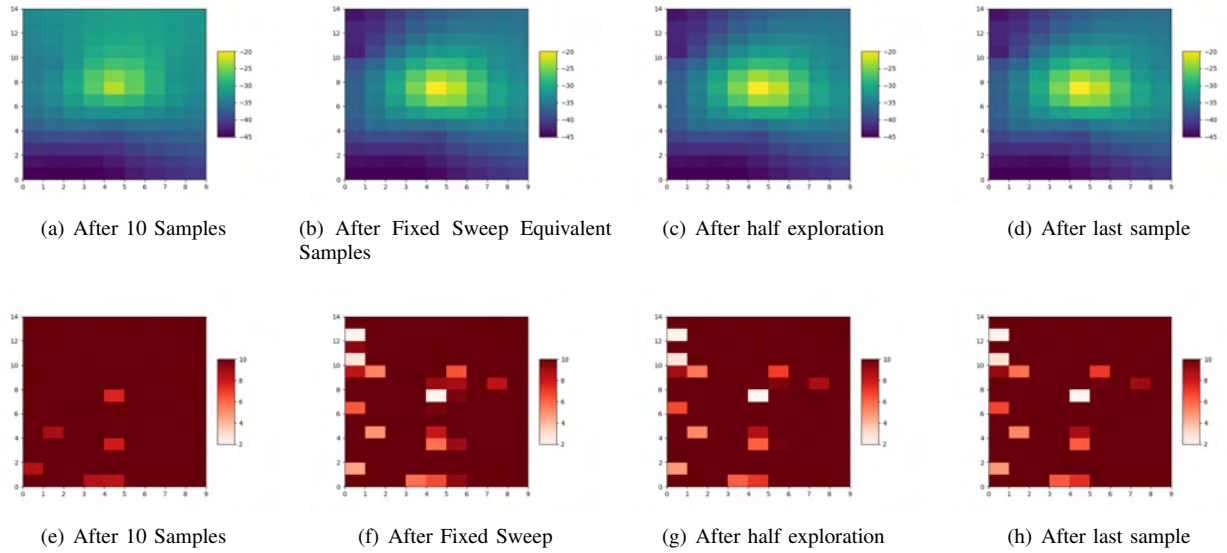

Figure S16. Random Walk Scenario - Mean and Variance for MaxMean Approach and Source location (4,7)

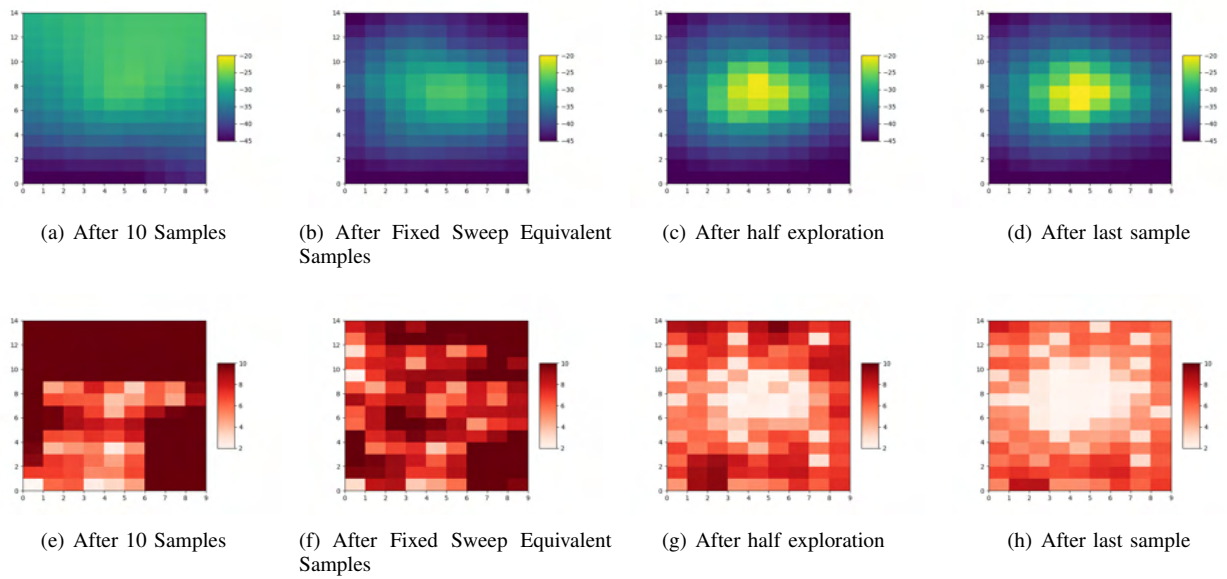

Figure S17. Random Walk Scenario - Mean and Variance for Alpha0.25 Approach and Source location (4,7)

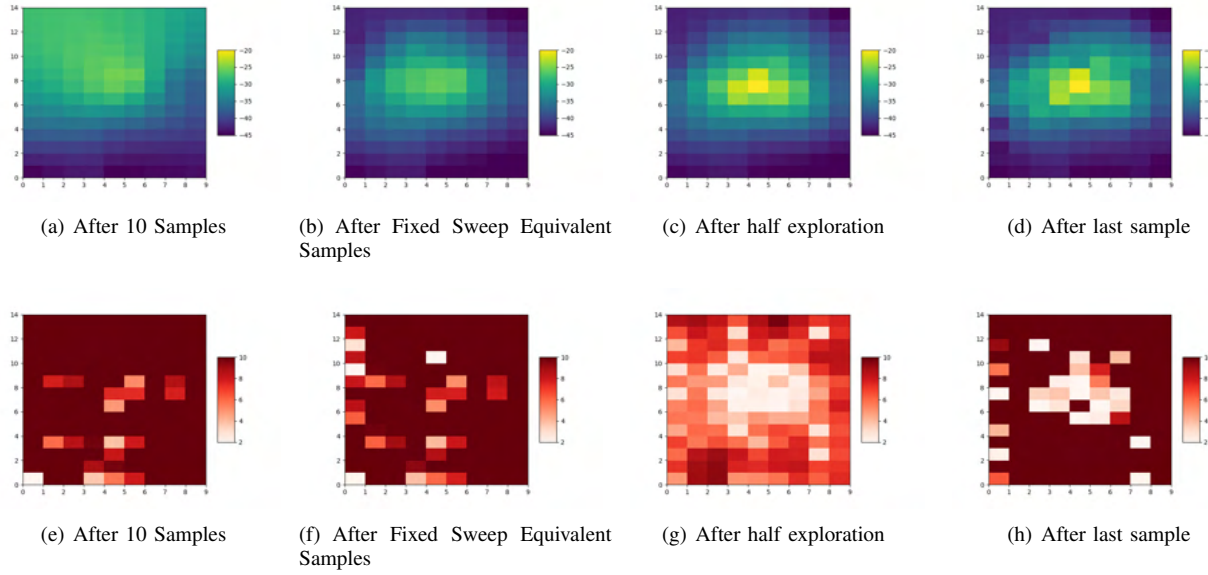

Figure S18. Random Walk Scenario - Mean and Variance for Alpha 0.5 Approach and Source location (4,7)

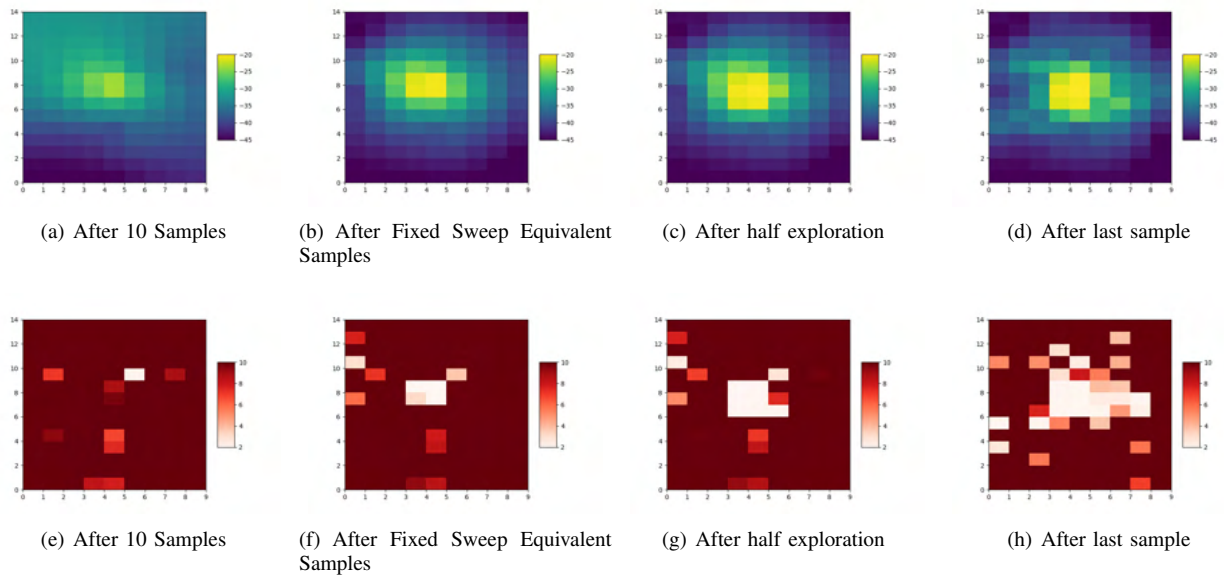

Figure S19. Random Walk Scenario - Mean and Variance for Alpha0.75 Approach and Source location (4,7)

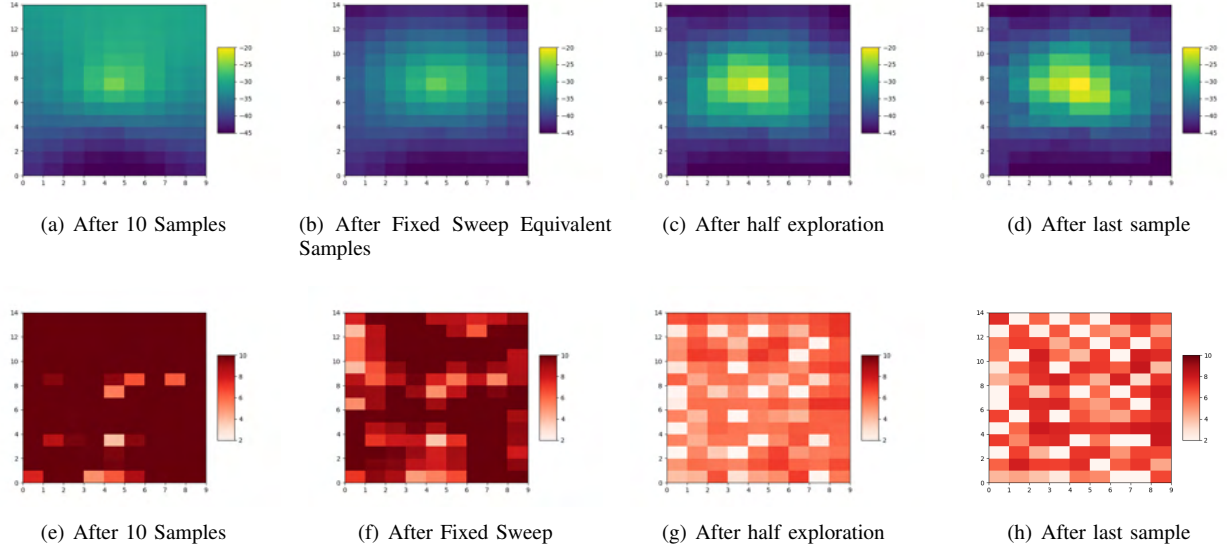

Figure S20. Random Walk Scenario - Mean and Variance for MaxVarMaxMean Approach and Source location (4,7)

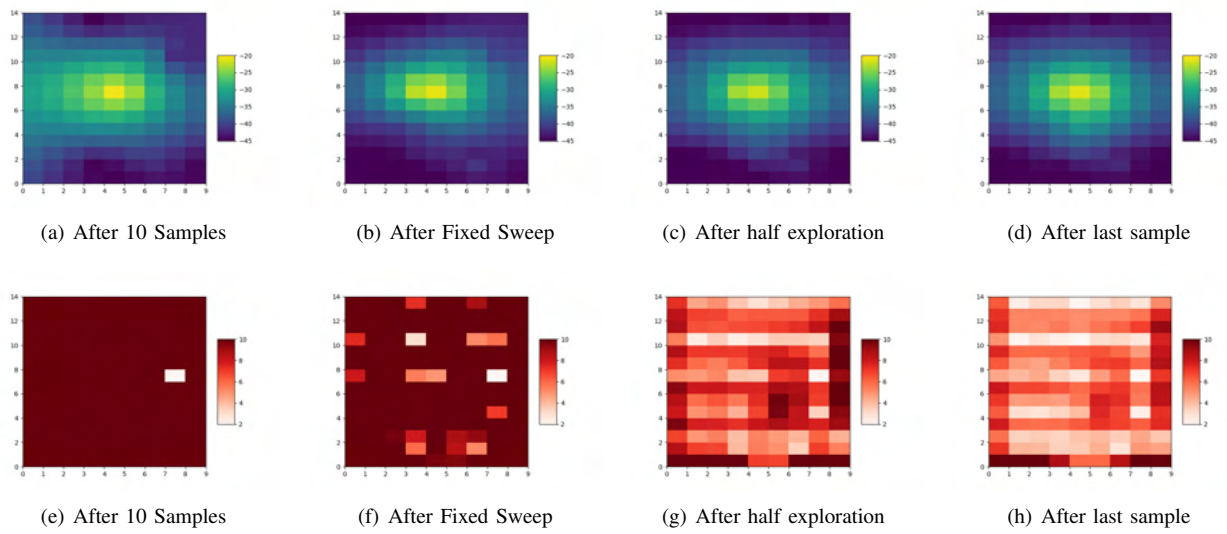

Figure S21. Fixed Voronoi Partition - Mean and Variance for Random Walk Baseline and Source location (4,7)

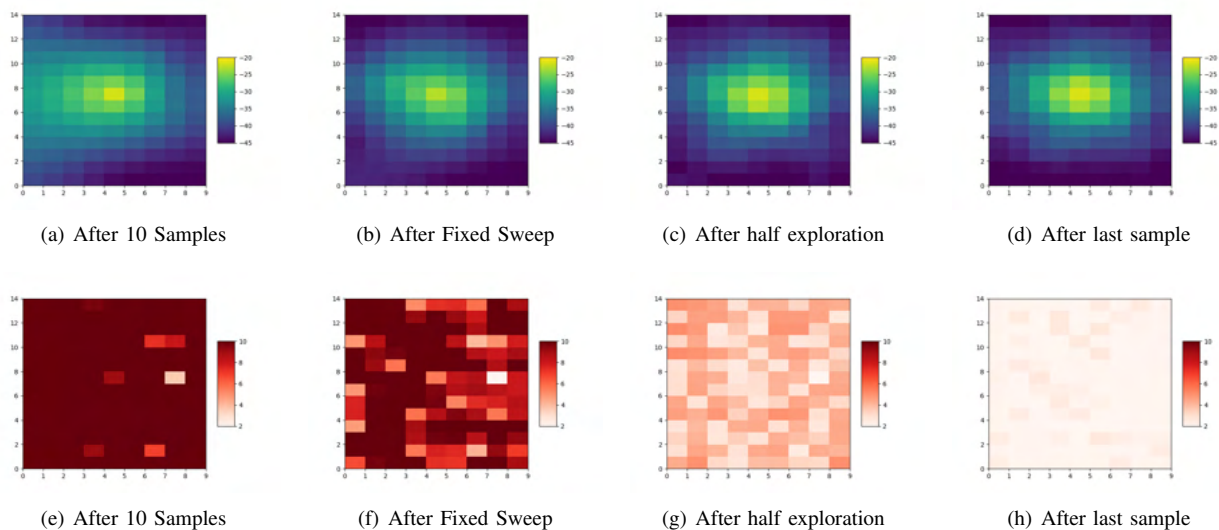

Figure S22. Fixed Voronoi Partition - Mean and Variance for MaxVar Approach and Source location (4,7)

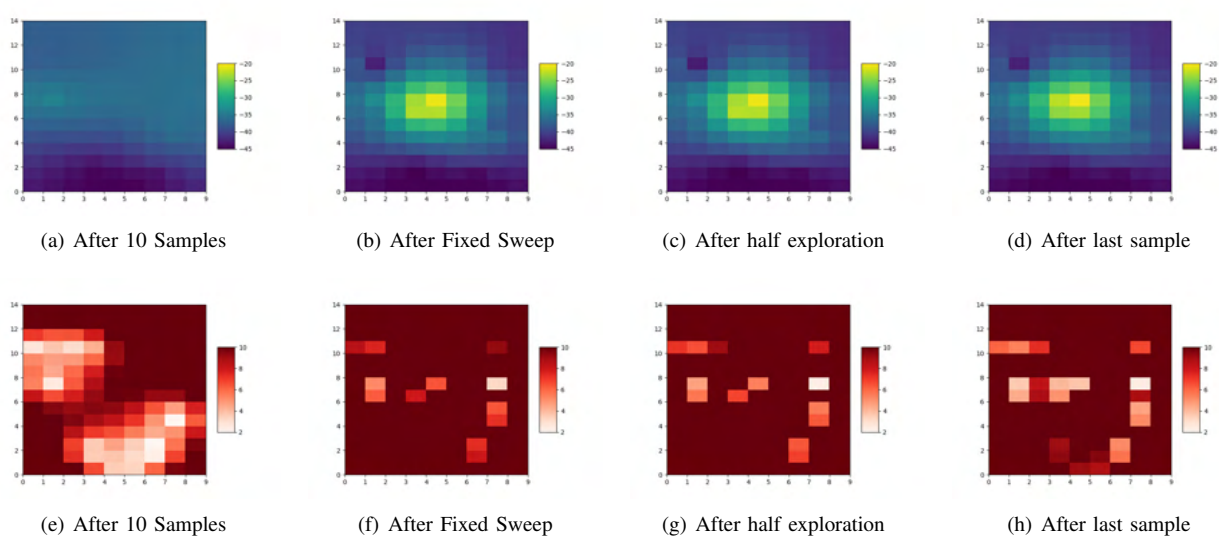

Figure S23. Fixed Voronoi Partition - Mean and Variance for MaxMean Approach and Source location (4,7)

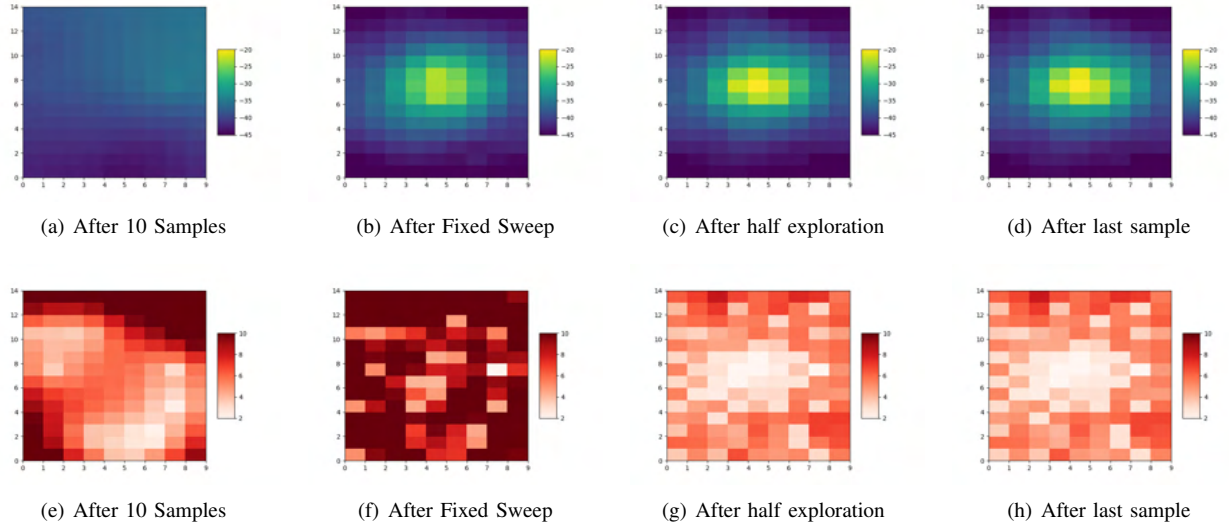

Figure S24. Fixed Voronoi Partition - Mean and Variance for Alpha0.25 Approach and Source location (4,7)

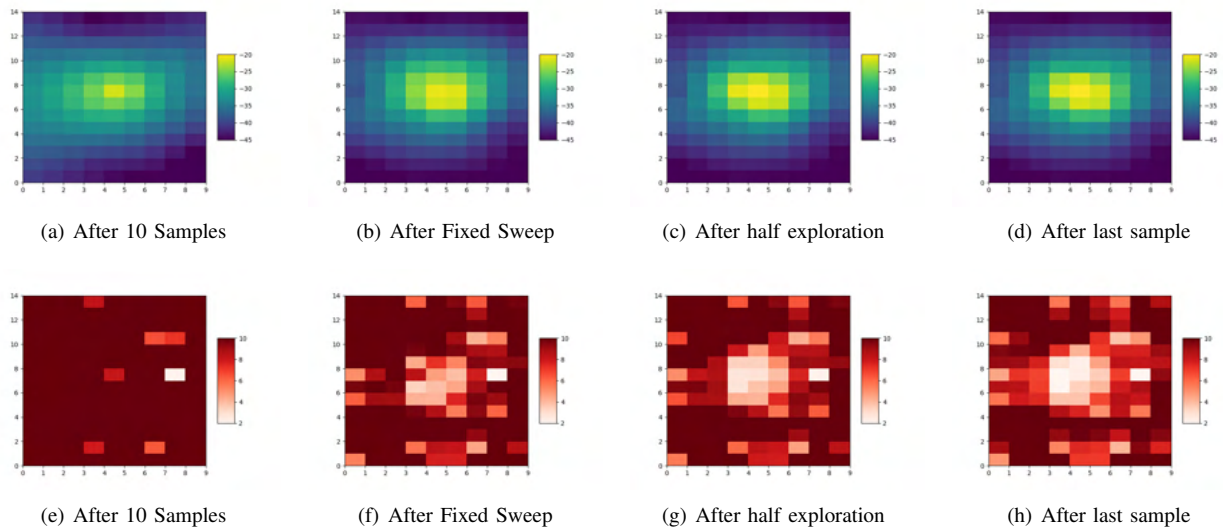

Figure S25. Fixed Voronoi Partition - Mean and Variance for Alpha0.5 Approach and Source location (4,7)



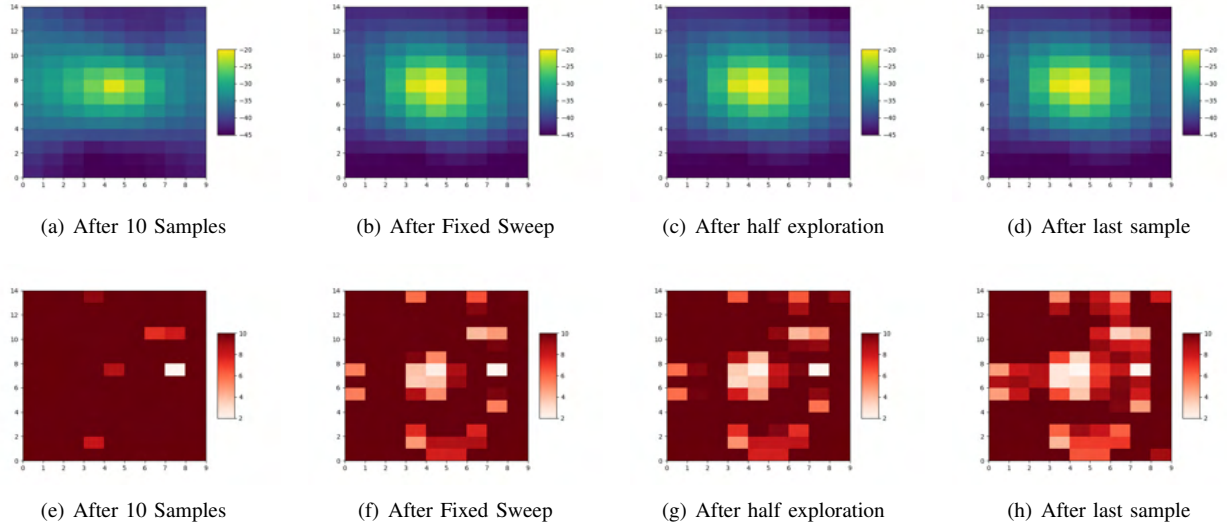

Figure S26. Fixed Voronoi Partition - Mean and Variance for Alpha0.75 Approach and Source location (4,7)

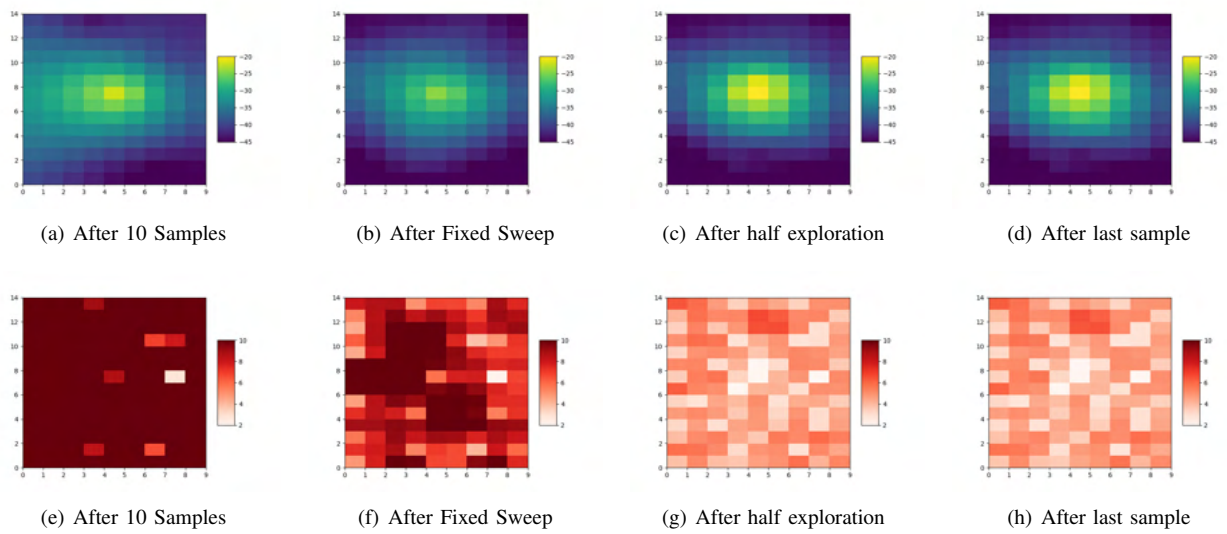

Figure S27. Fixed Voronoi Partition - Mean and Variance for MaxVarMaxMean Approach and Source location (4,7)

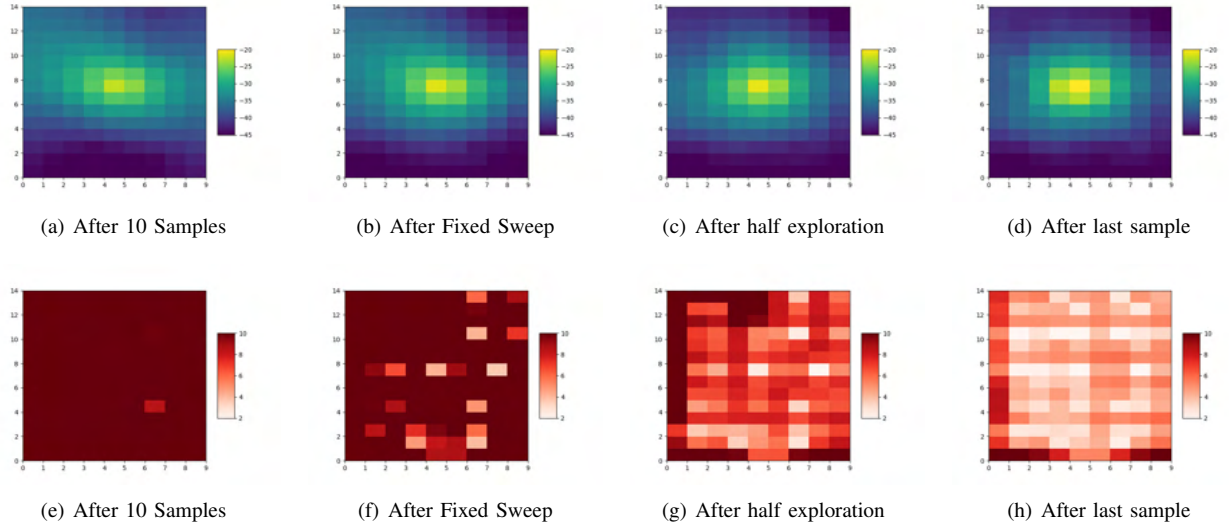

Figure S28. Dynamic Voronoi Partition - Mean and Variance for Random Walk Baseline and Source location (4,7)

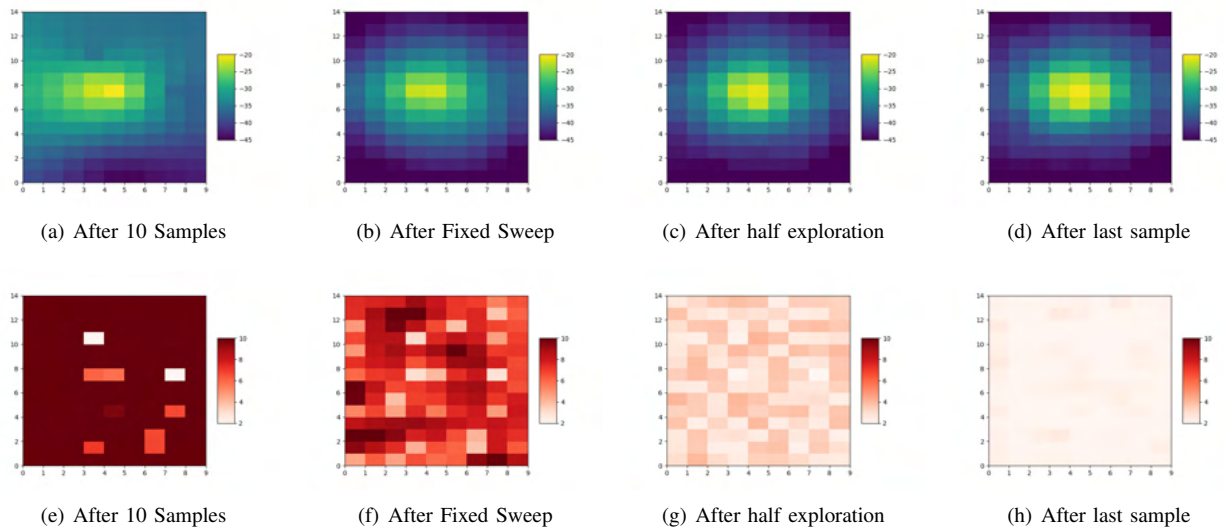

Figure S29. Dynamic Voronoi Partition - Mean and Variance for MaxVar Approach and Source location (4,7)

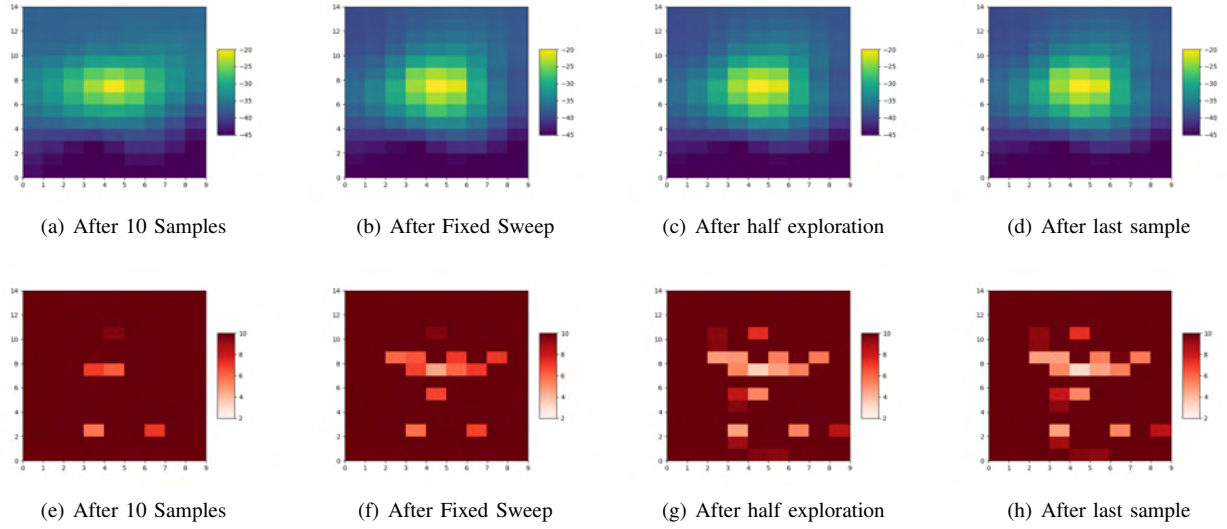

Figure S30. Dynamic Voronoi Partition - Mean and Variance for MaxMean Approach and Source location (4,7)

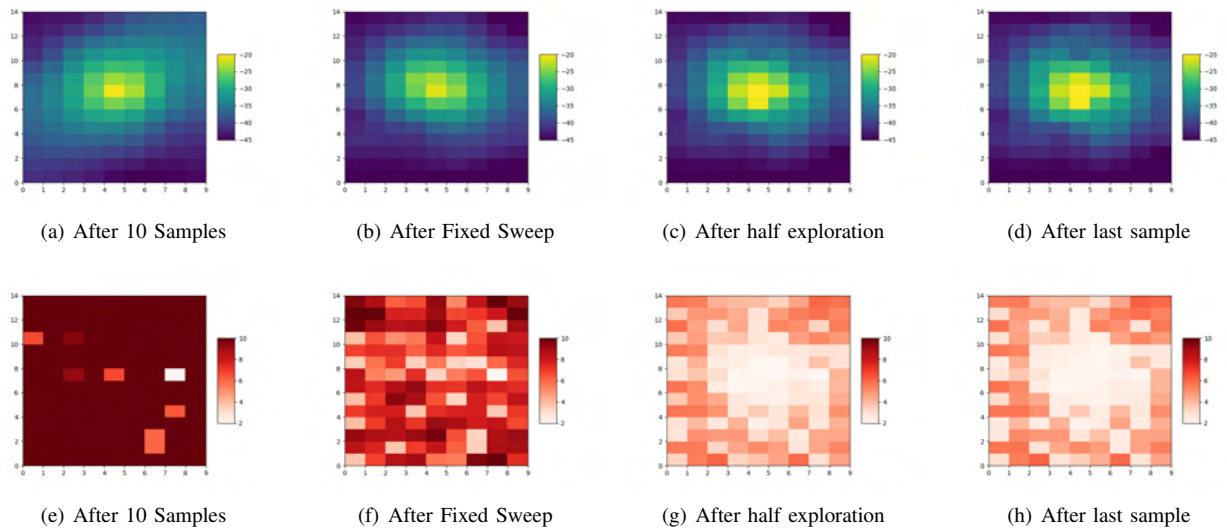

Figure S31. Dynamic Voronoi Partition - Mean and Variance for Alpha0.25 Approach and Source location (4,7)

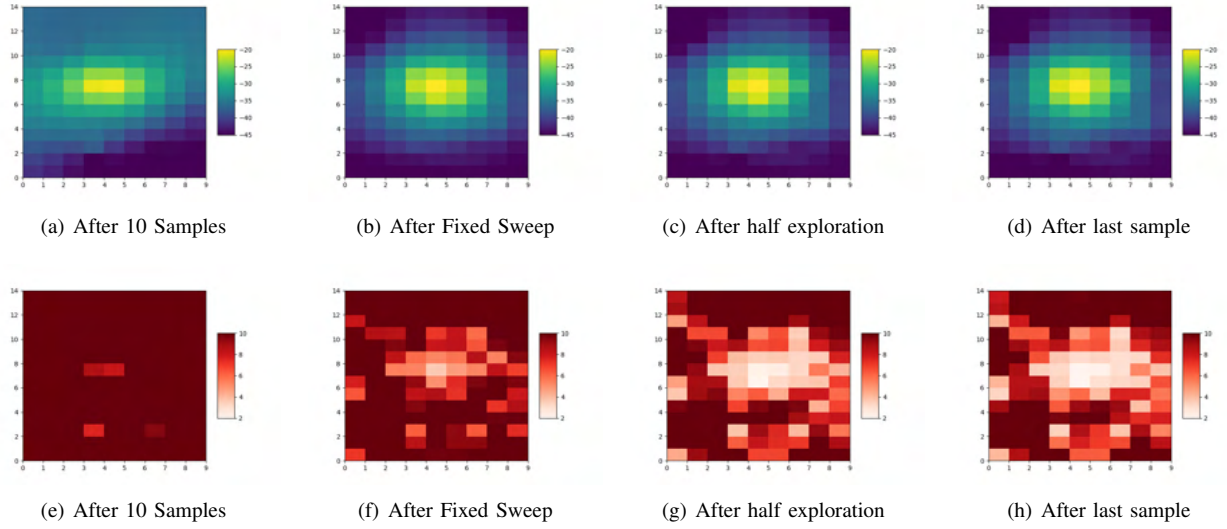

Figure S32. Dynamic Voronoi Partition - Mean and Variance for Alpha0.5 Approach and Source location (4,7)

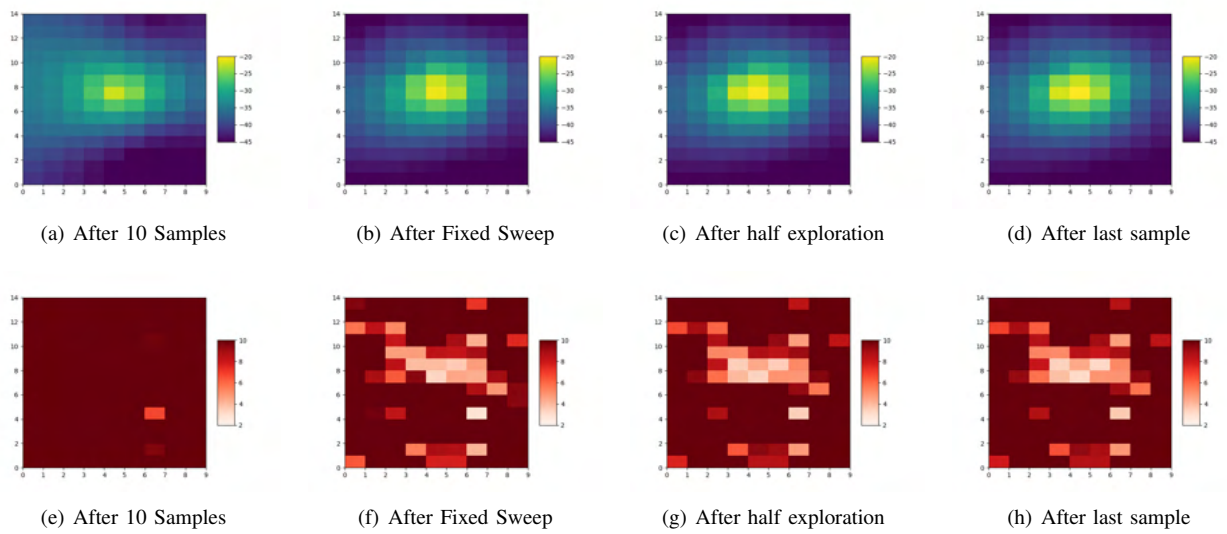

Figure S33. Dynamic Voronoi Partition - Mean and Variance for Alpha0.75 Approach and Source location (4,7)

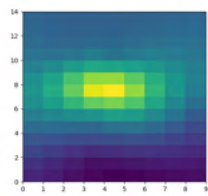

(a) After 10 Samples

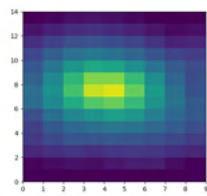

(b) After Fixed Sweep

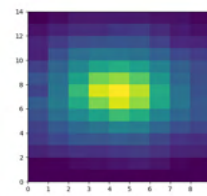

(c) After half exploration

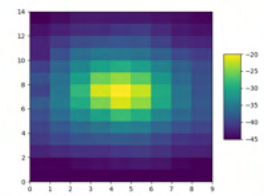

(d) After last sample

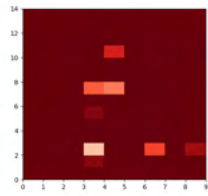

(e) After 10 Samples

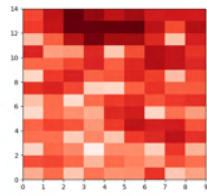

(f) After Fixed Sweep

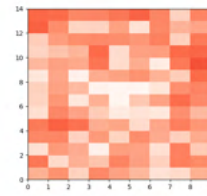

(g) After half exploration

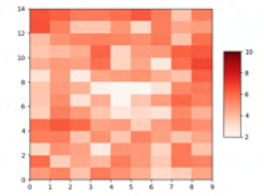

(h) After last sample

Figure S34. Dynamic Voronoi Partition - Mean and Variance for MaxVarMaxMean Approach and Source location (4,7)
